# Supplementary material
Source: ML conference proceedings conference paper supplement (https://openreview.net/forum?id=L5Plw8hZmW2)

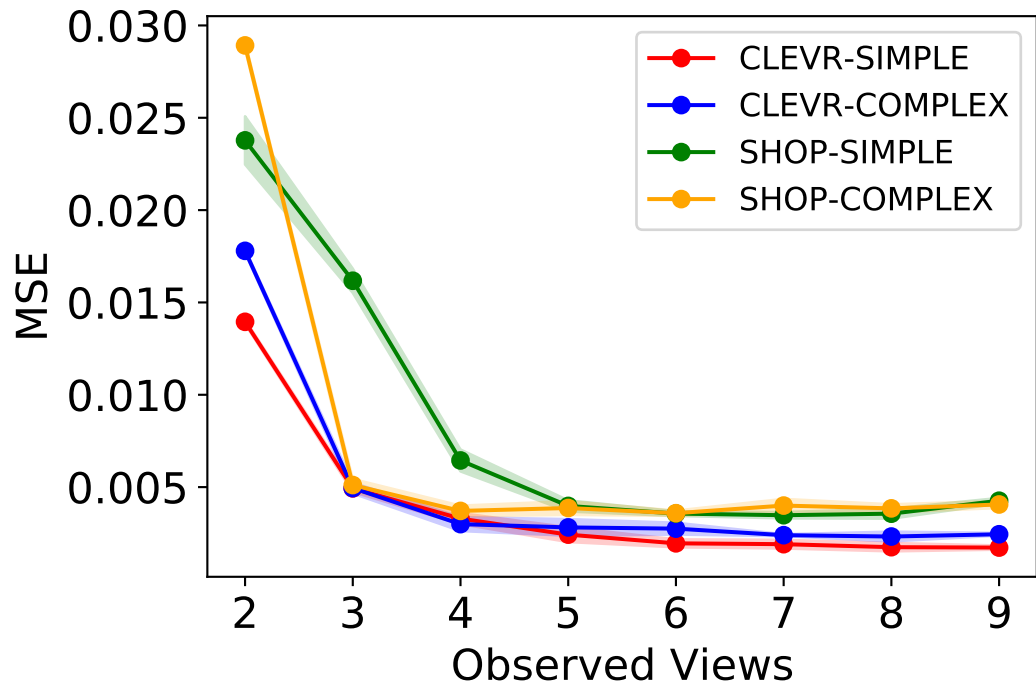

Supplement: supplementary_material [file attachment]

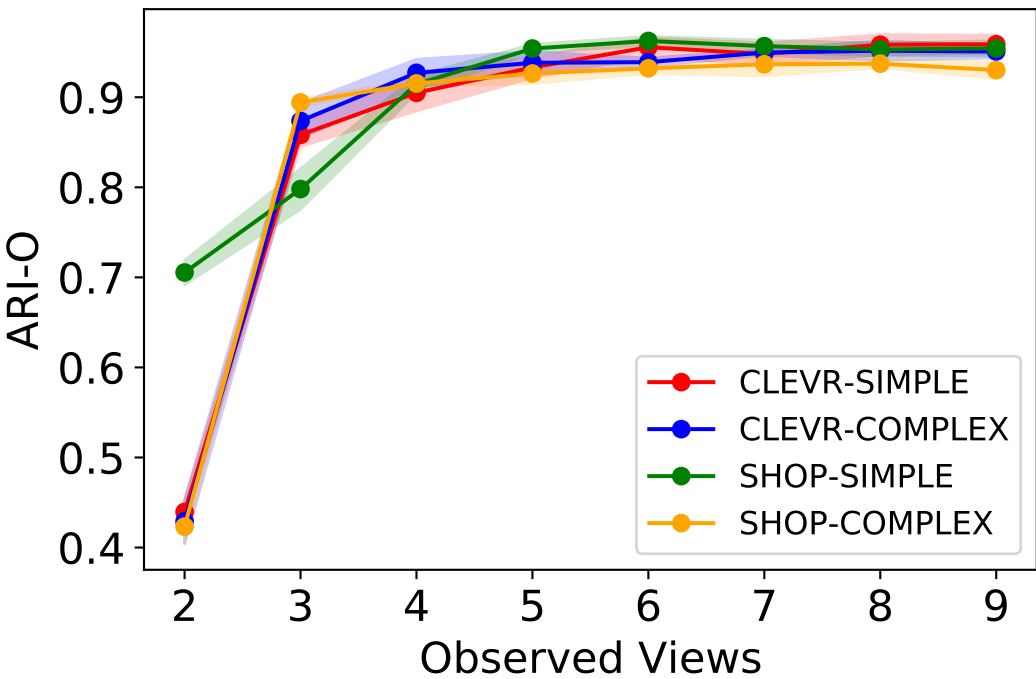

Supplement: supplementary_material [file attachment]

image

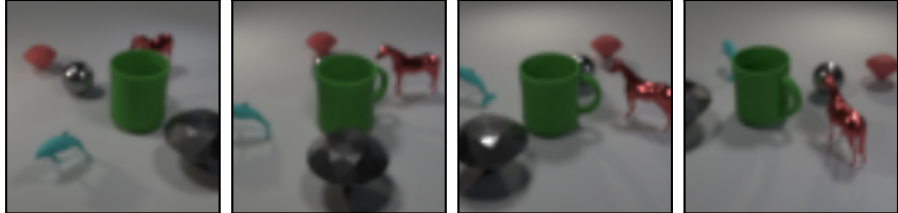

recon

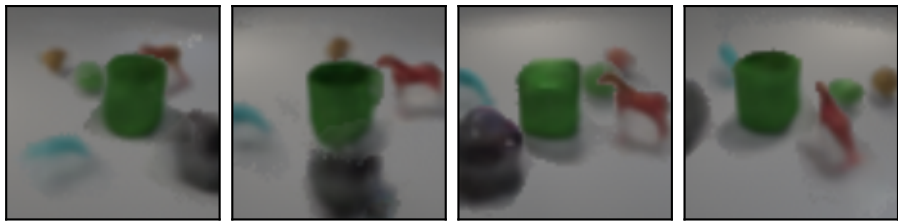

segment

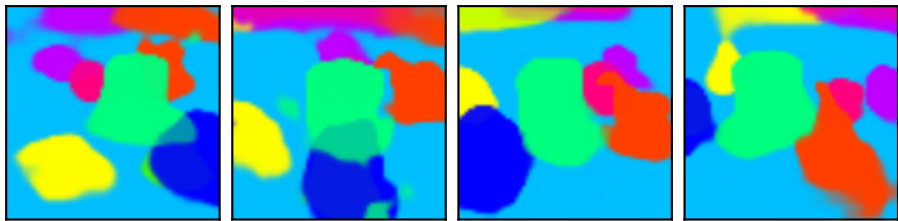

overlap

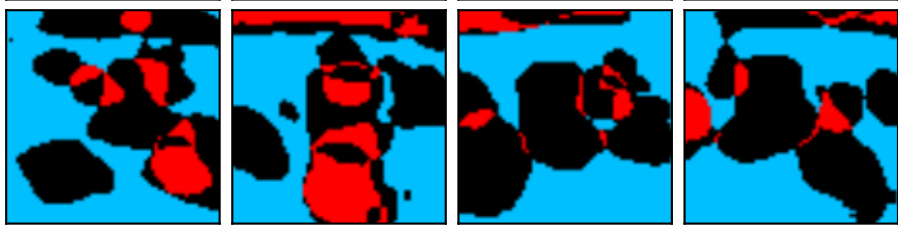

complete

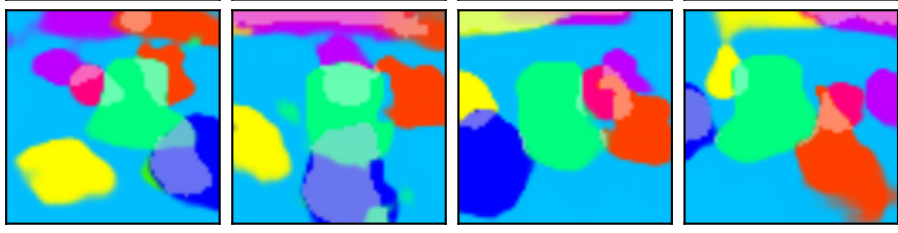

Supplement: supplementary_material [file attachment]

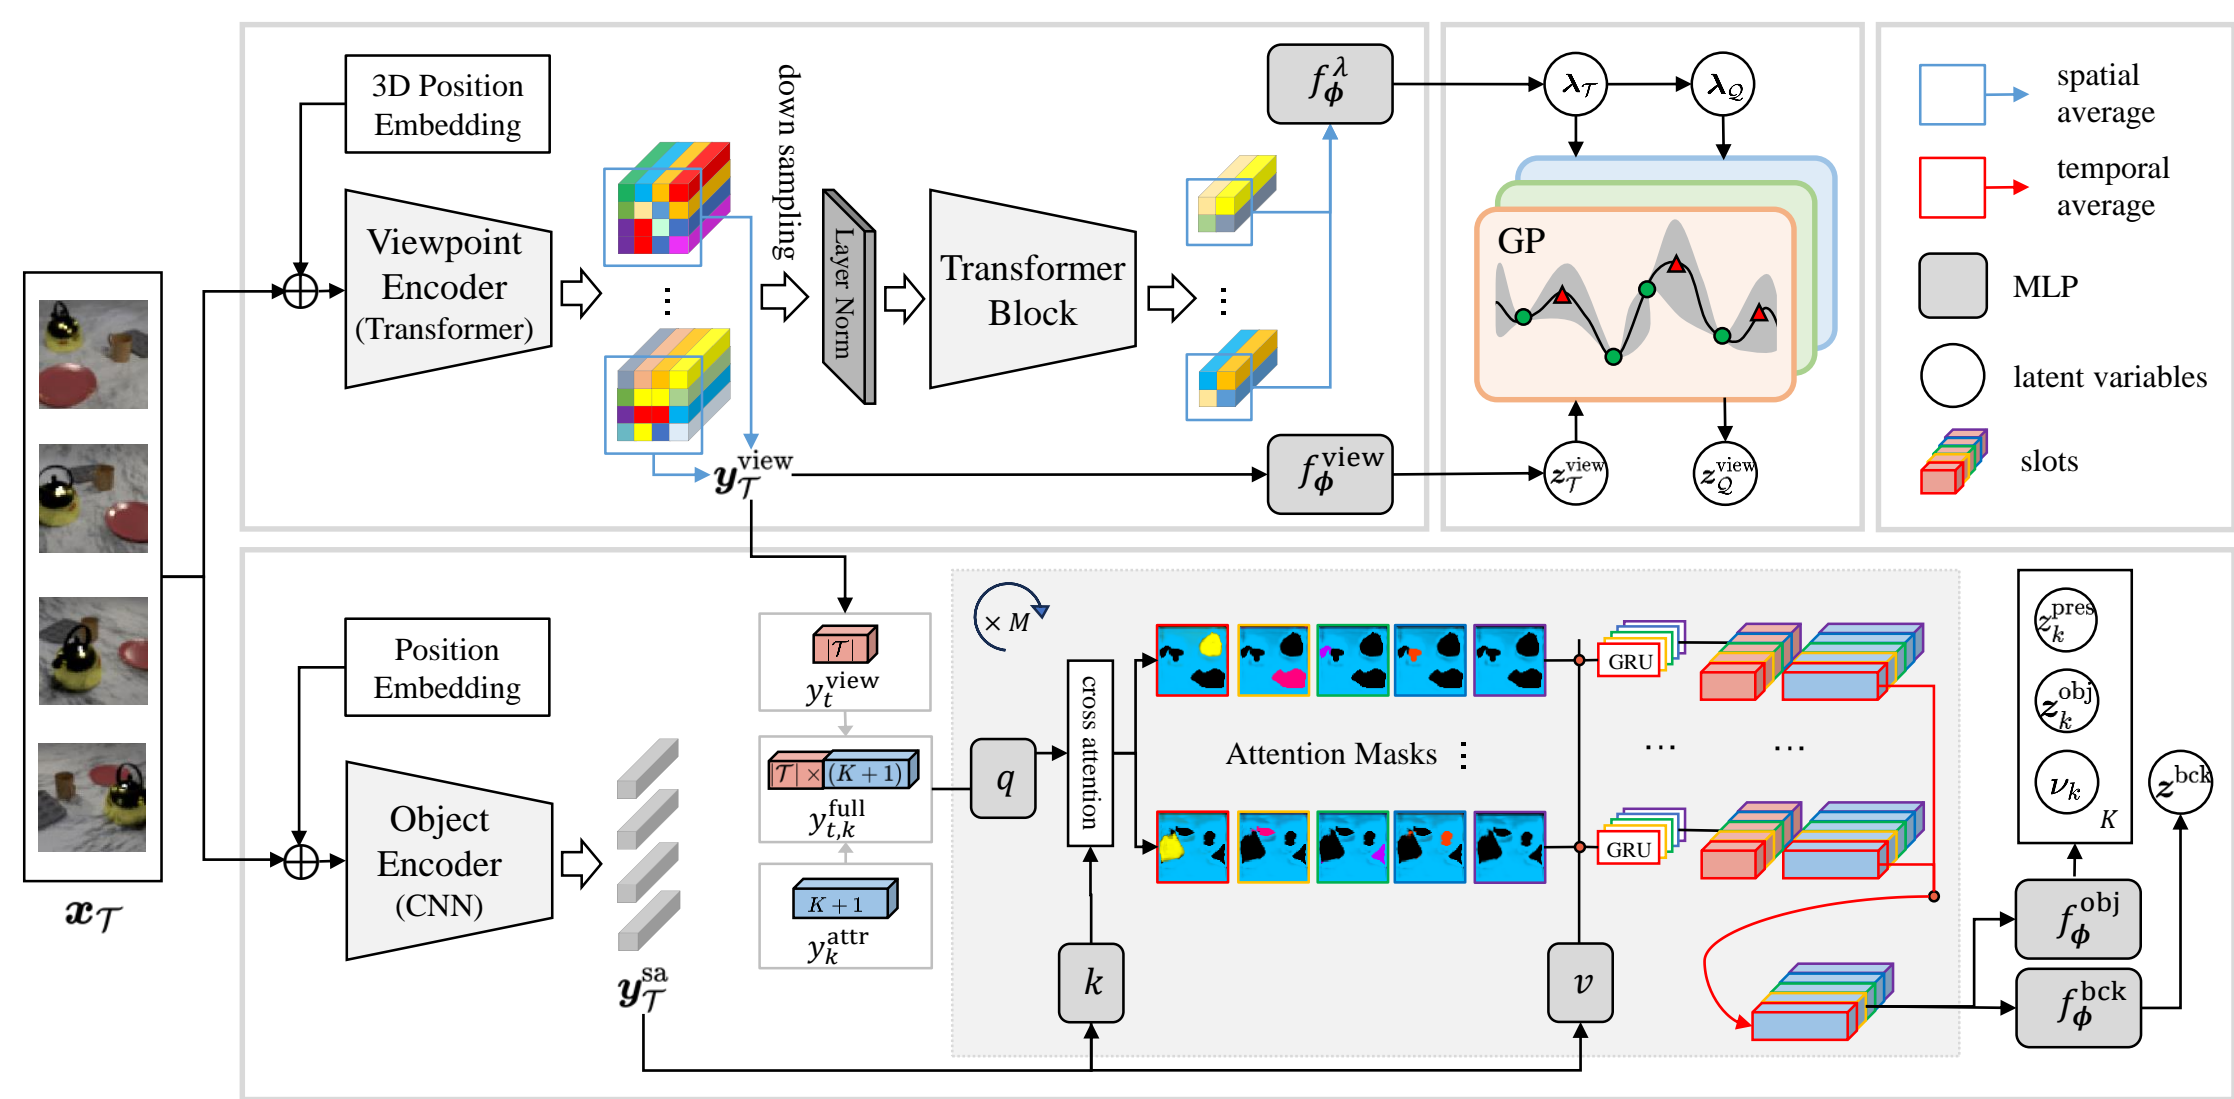

Supplement: supplementary_material [file attachment]

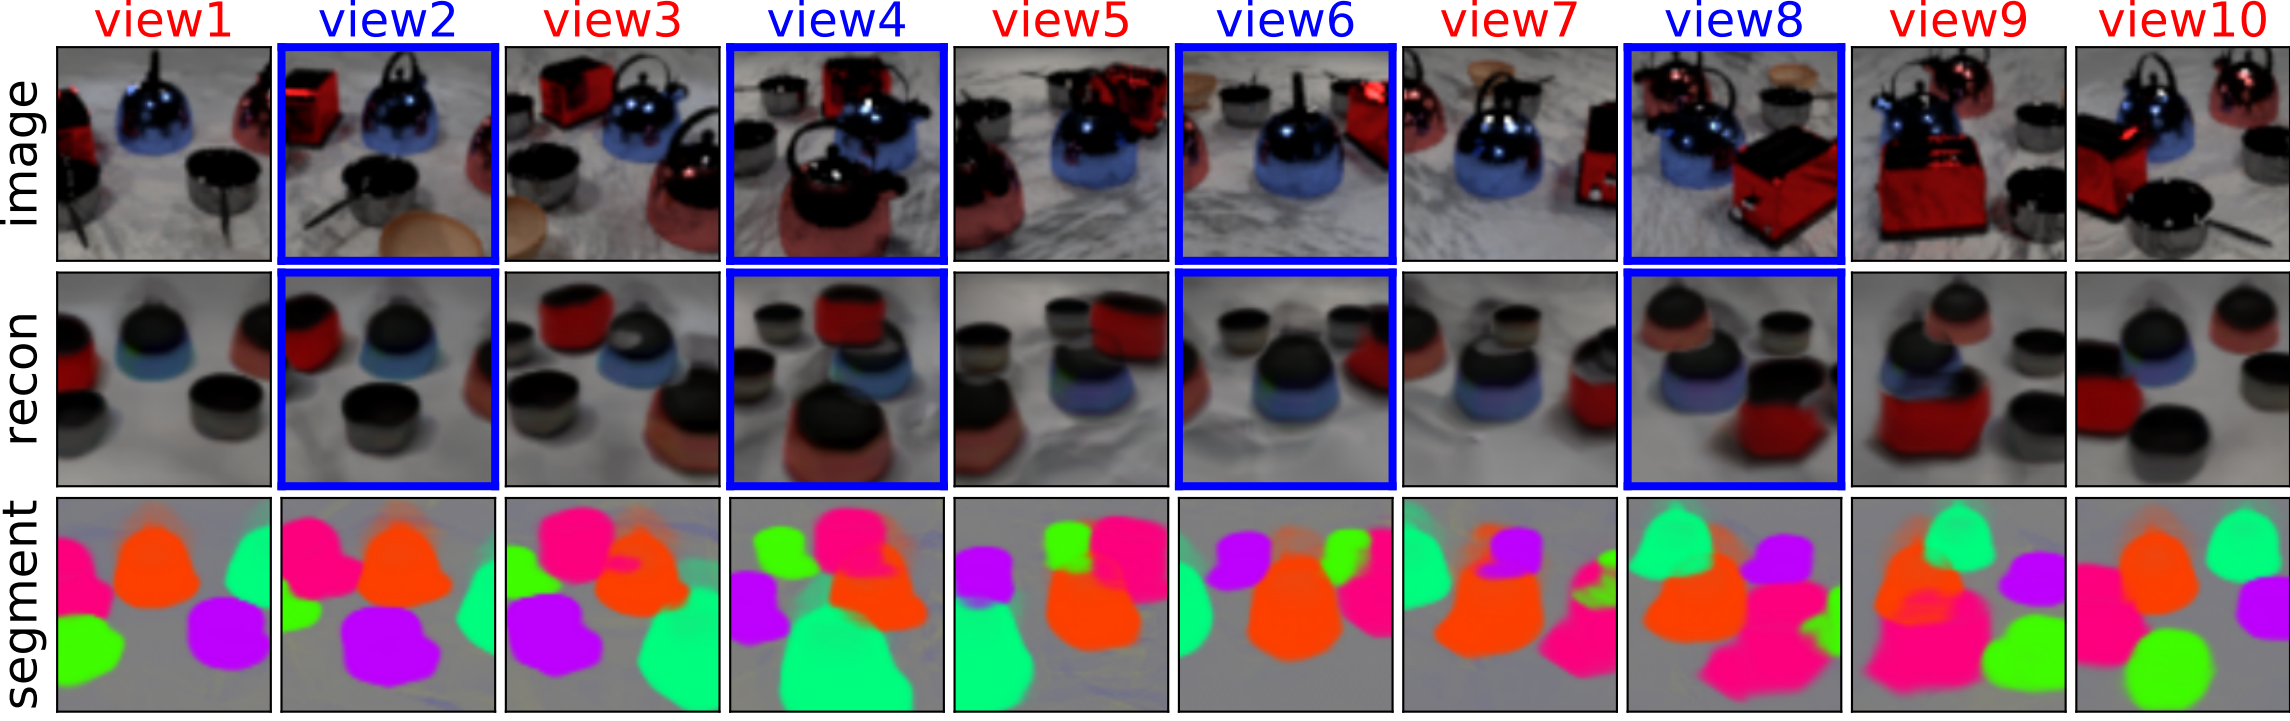

Supplement: supplementary_material [file attachment]

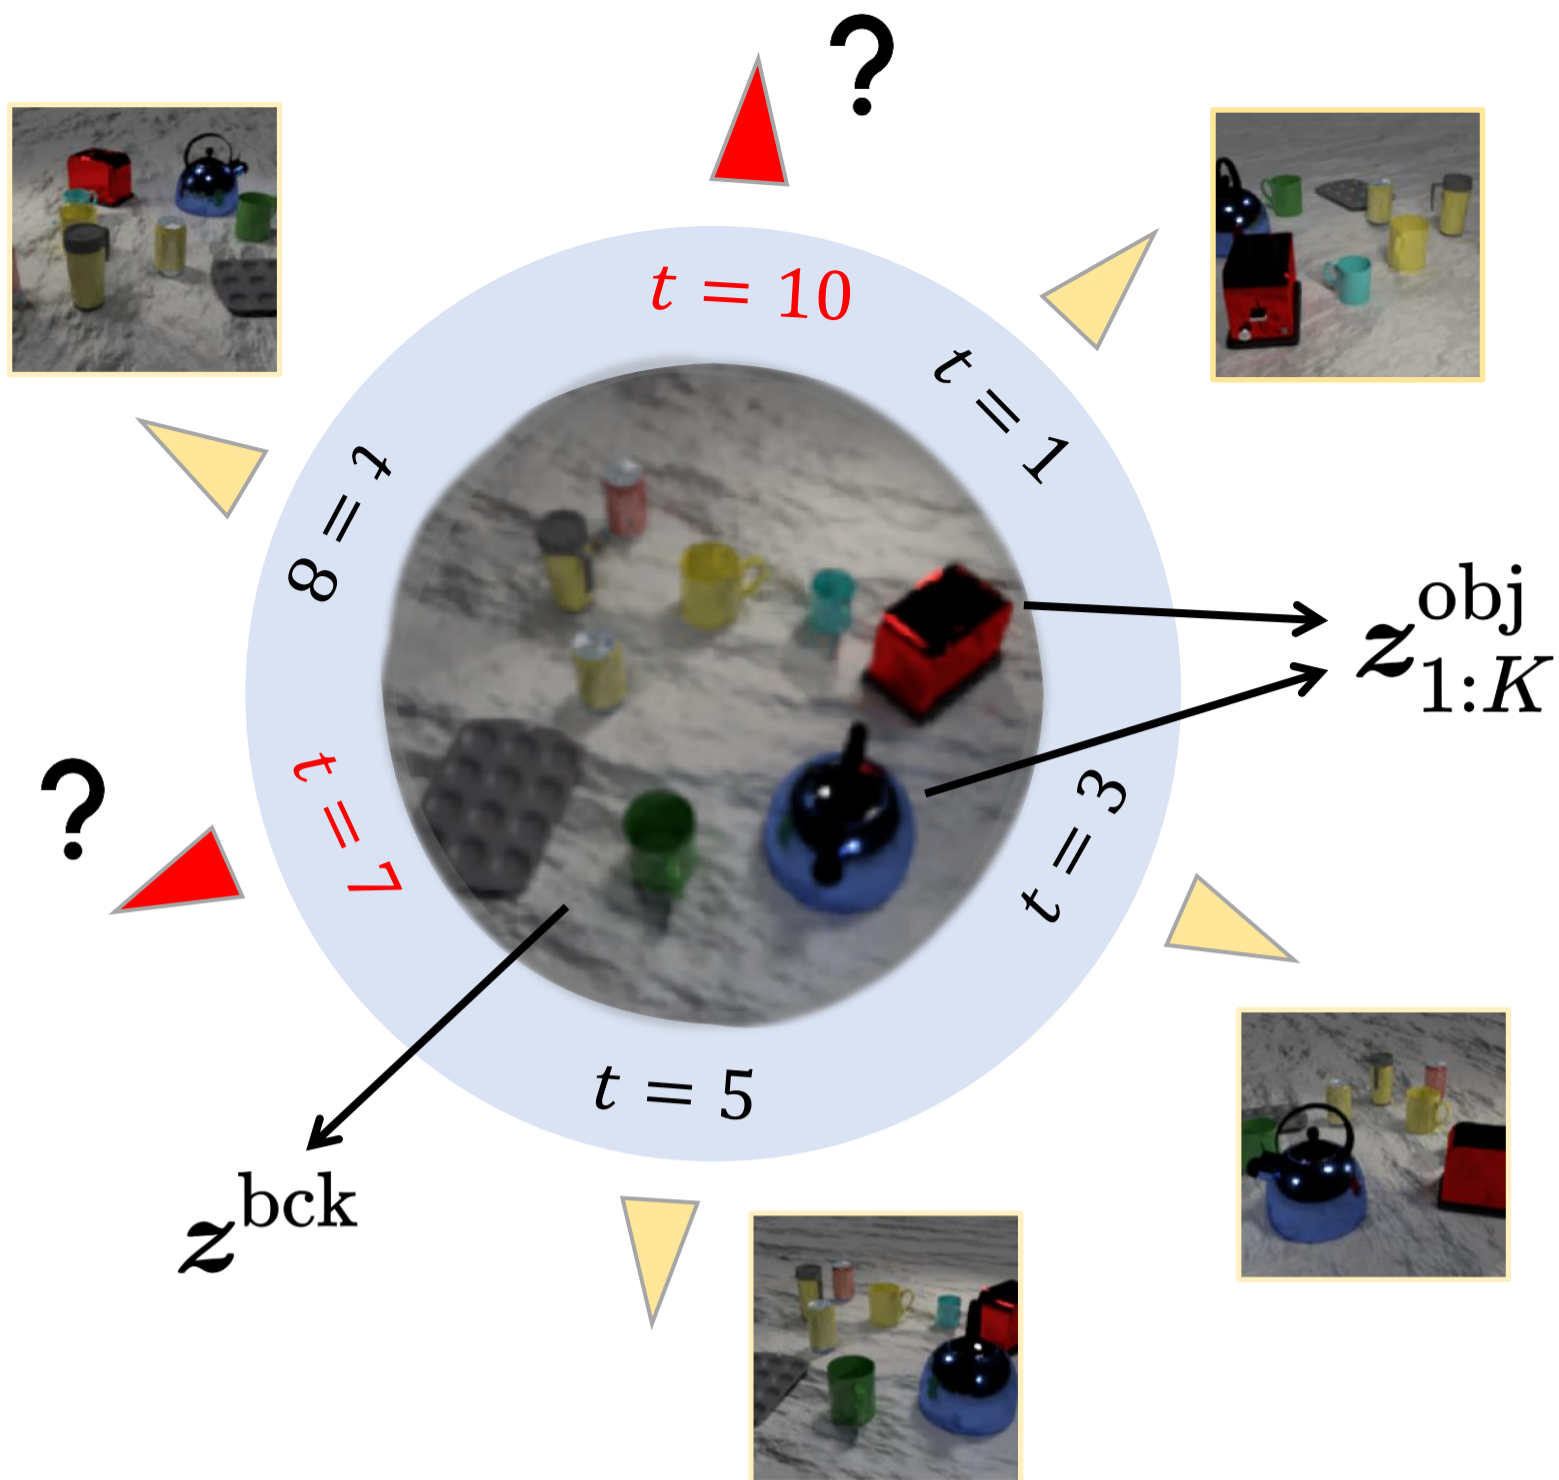

## Observations

$t = 1$        $t = 3$        $t = 5$        $t = 8$

## Predictions

$t = 7$        $t = 10$

(a)

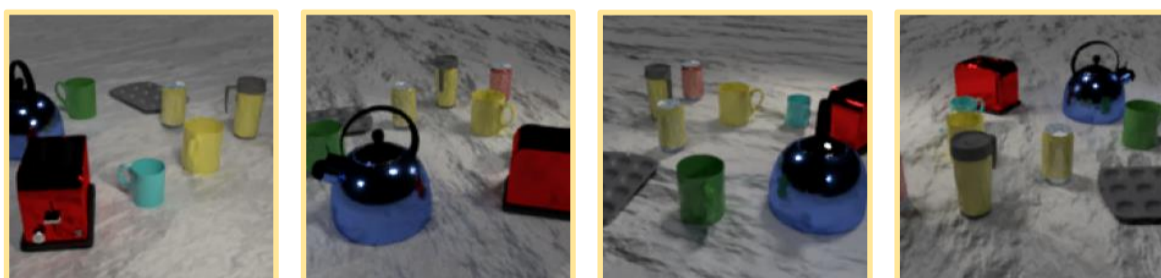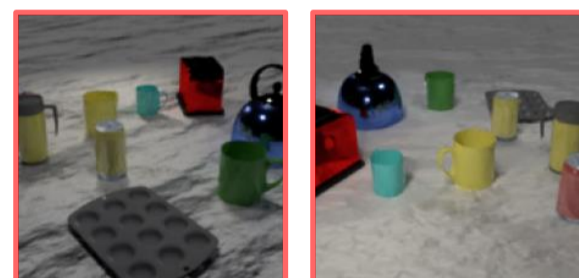

(b)

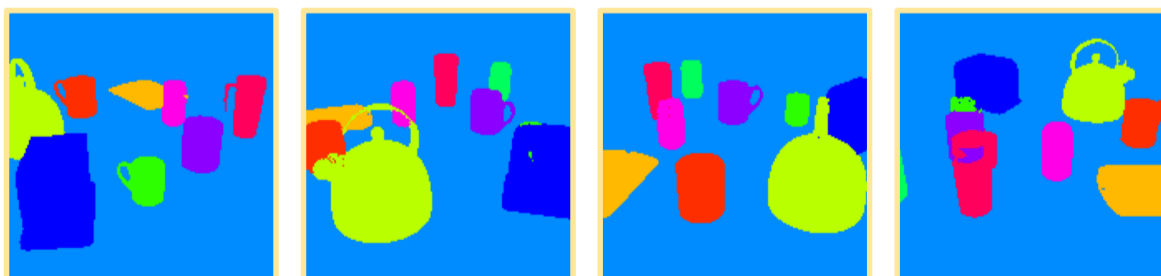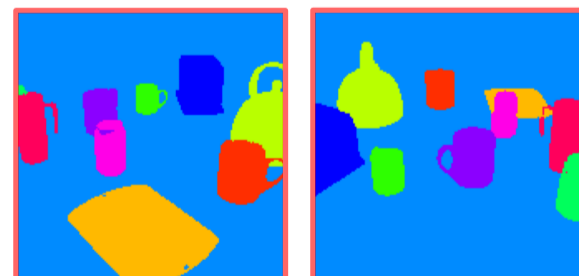

(c)

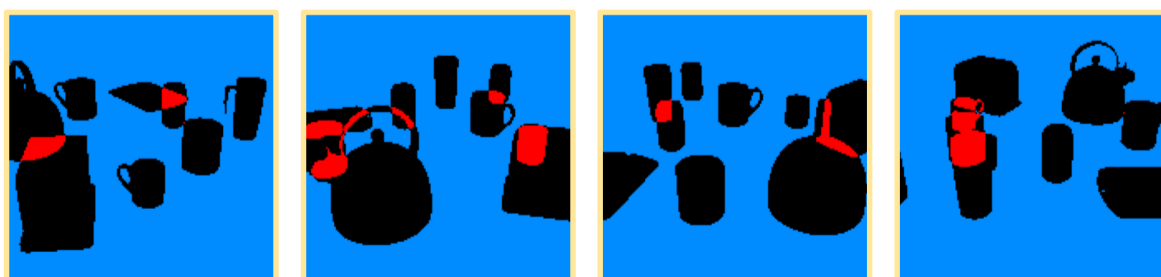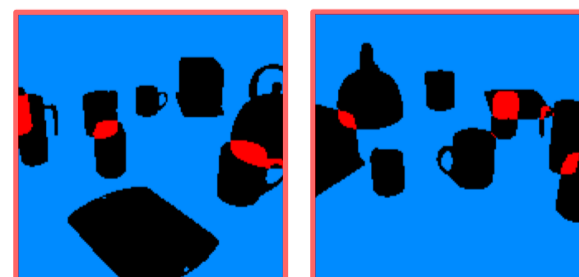

(d)

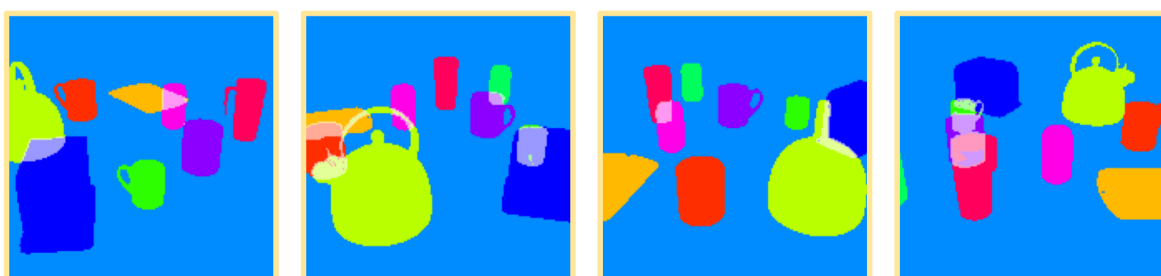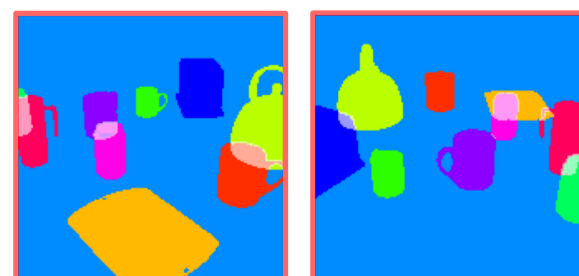

Supplement: supplementary_material [file attachment]

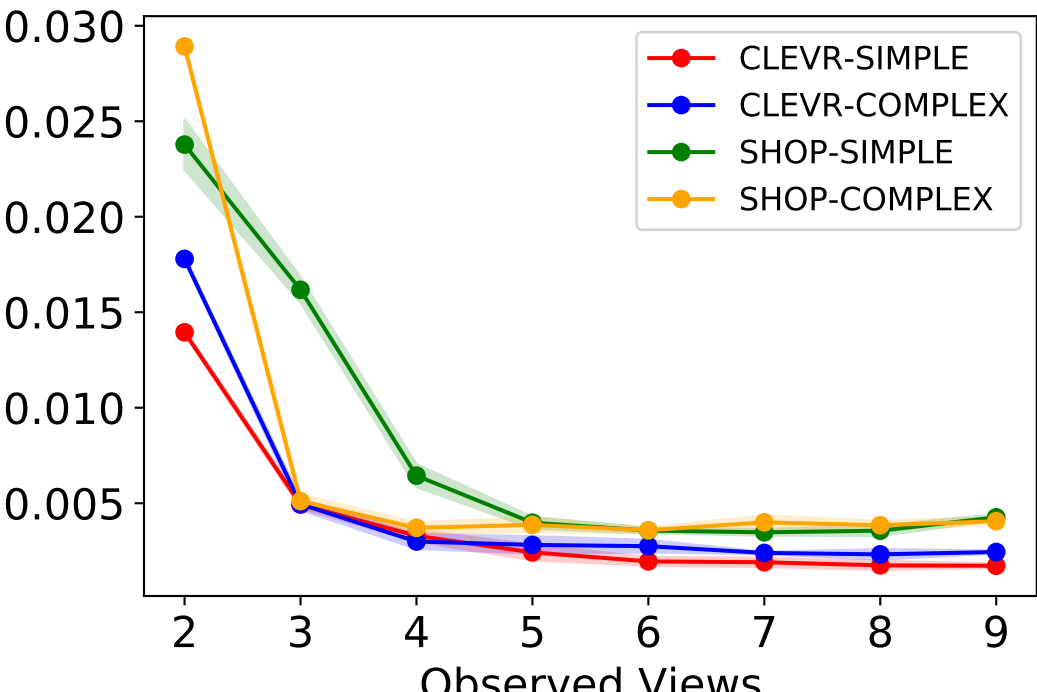

Supplement: supplementary_material [file attachment]

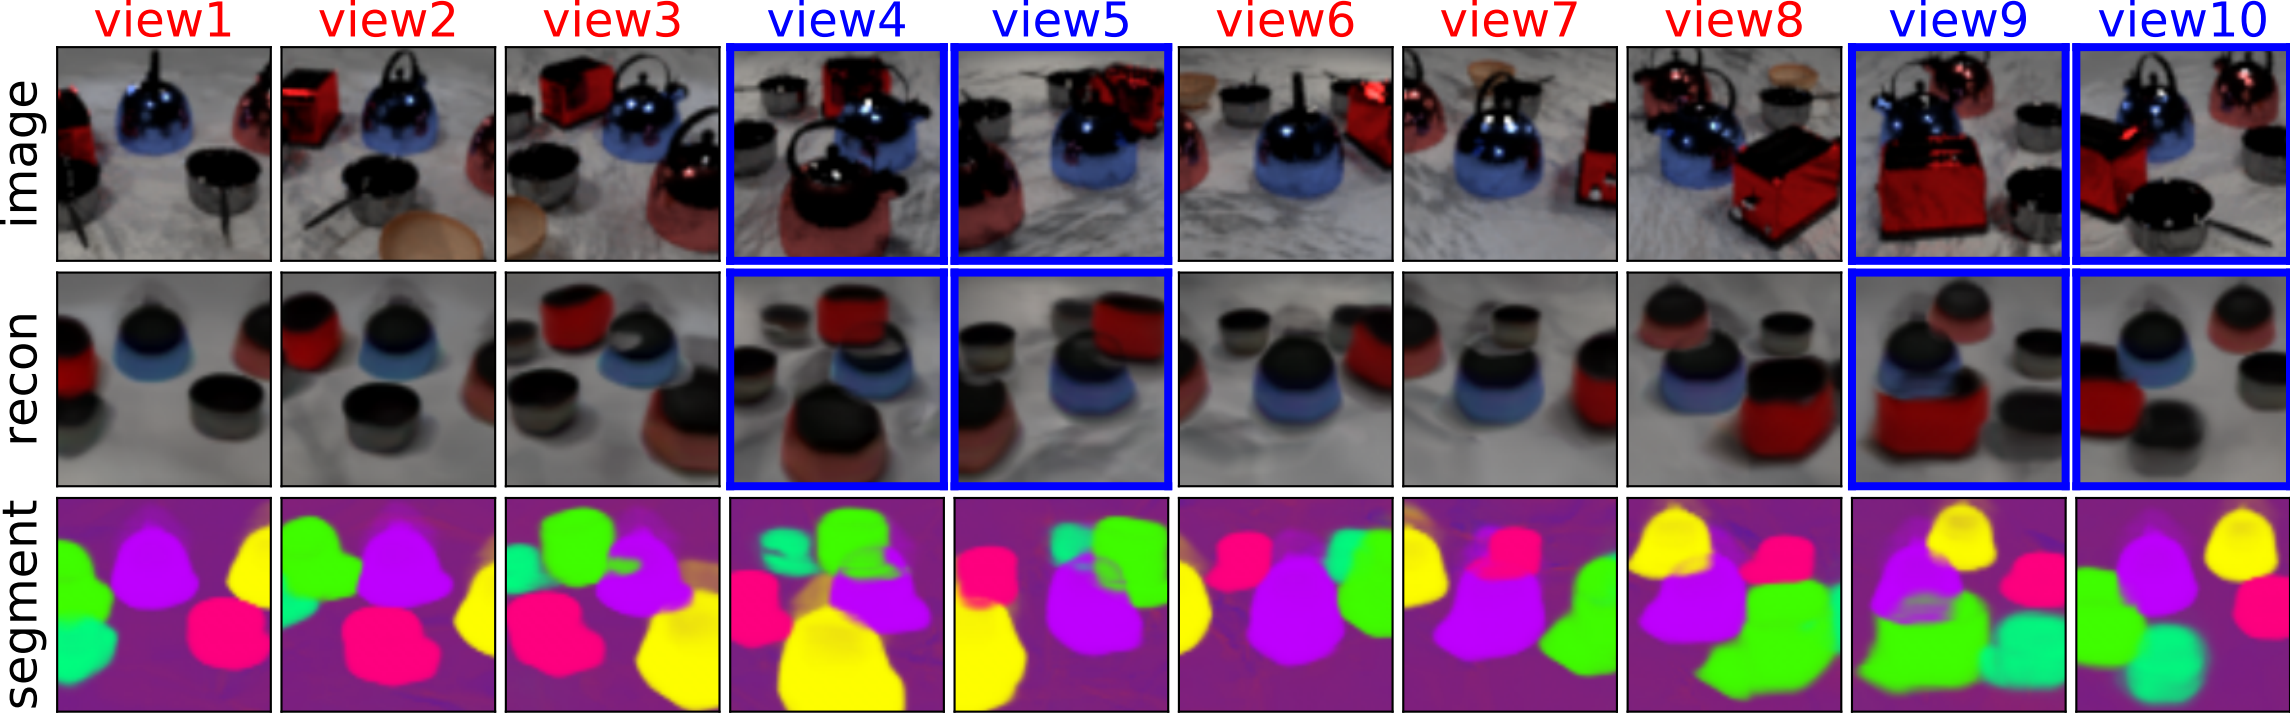

Supplement: supplementary_material [file attachment]

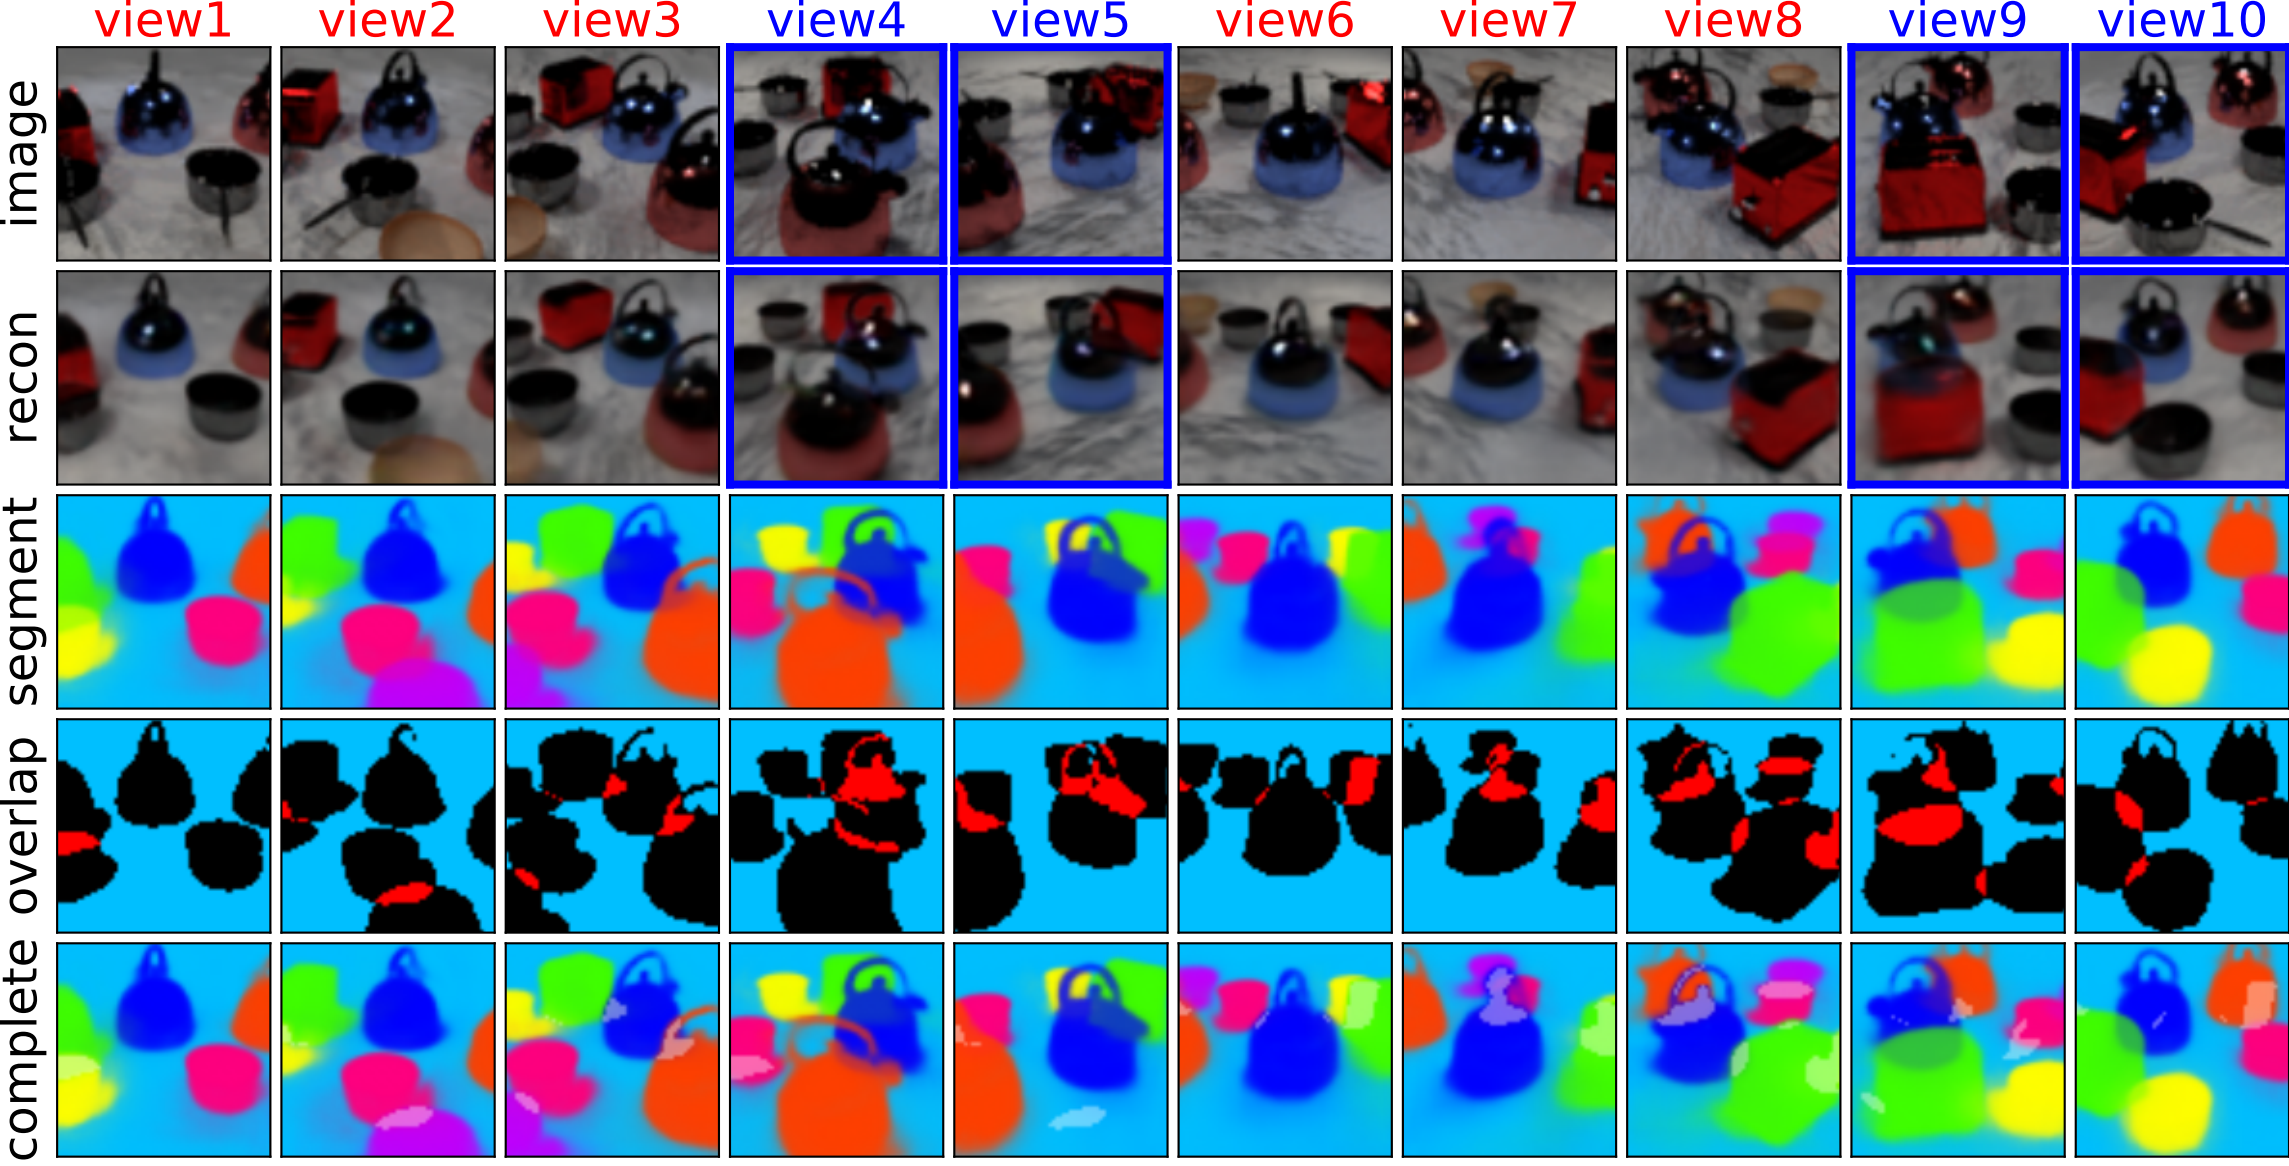

Supplement: supplementary_material [file attachment]

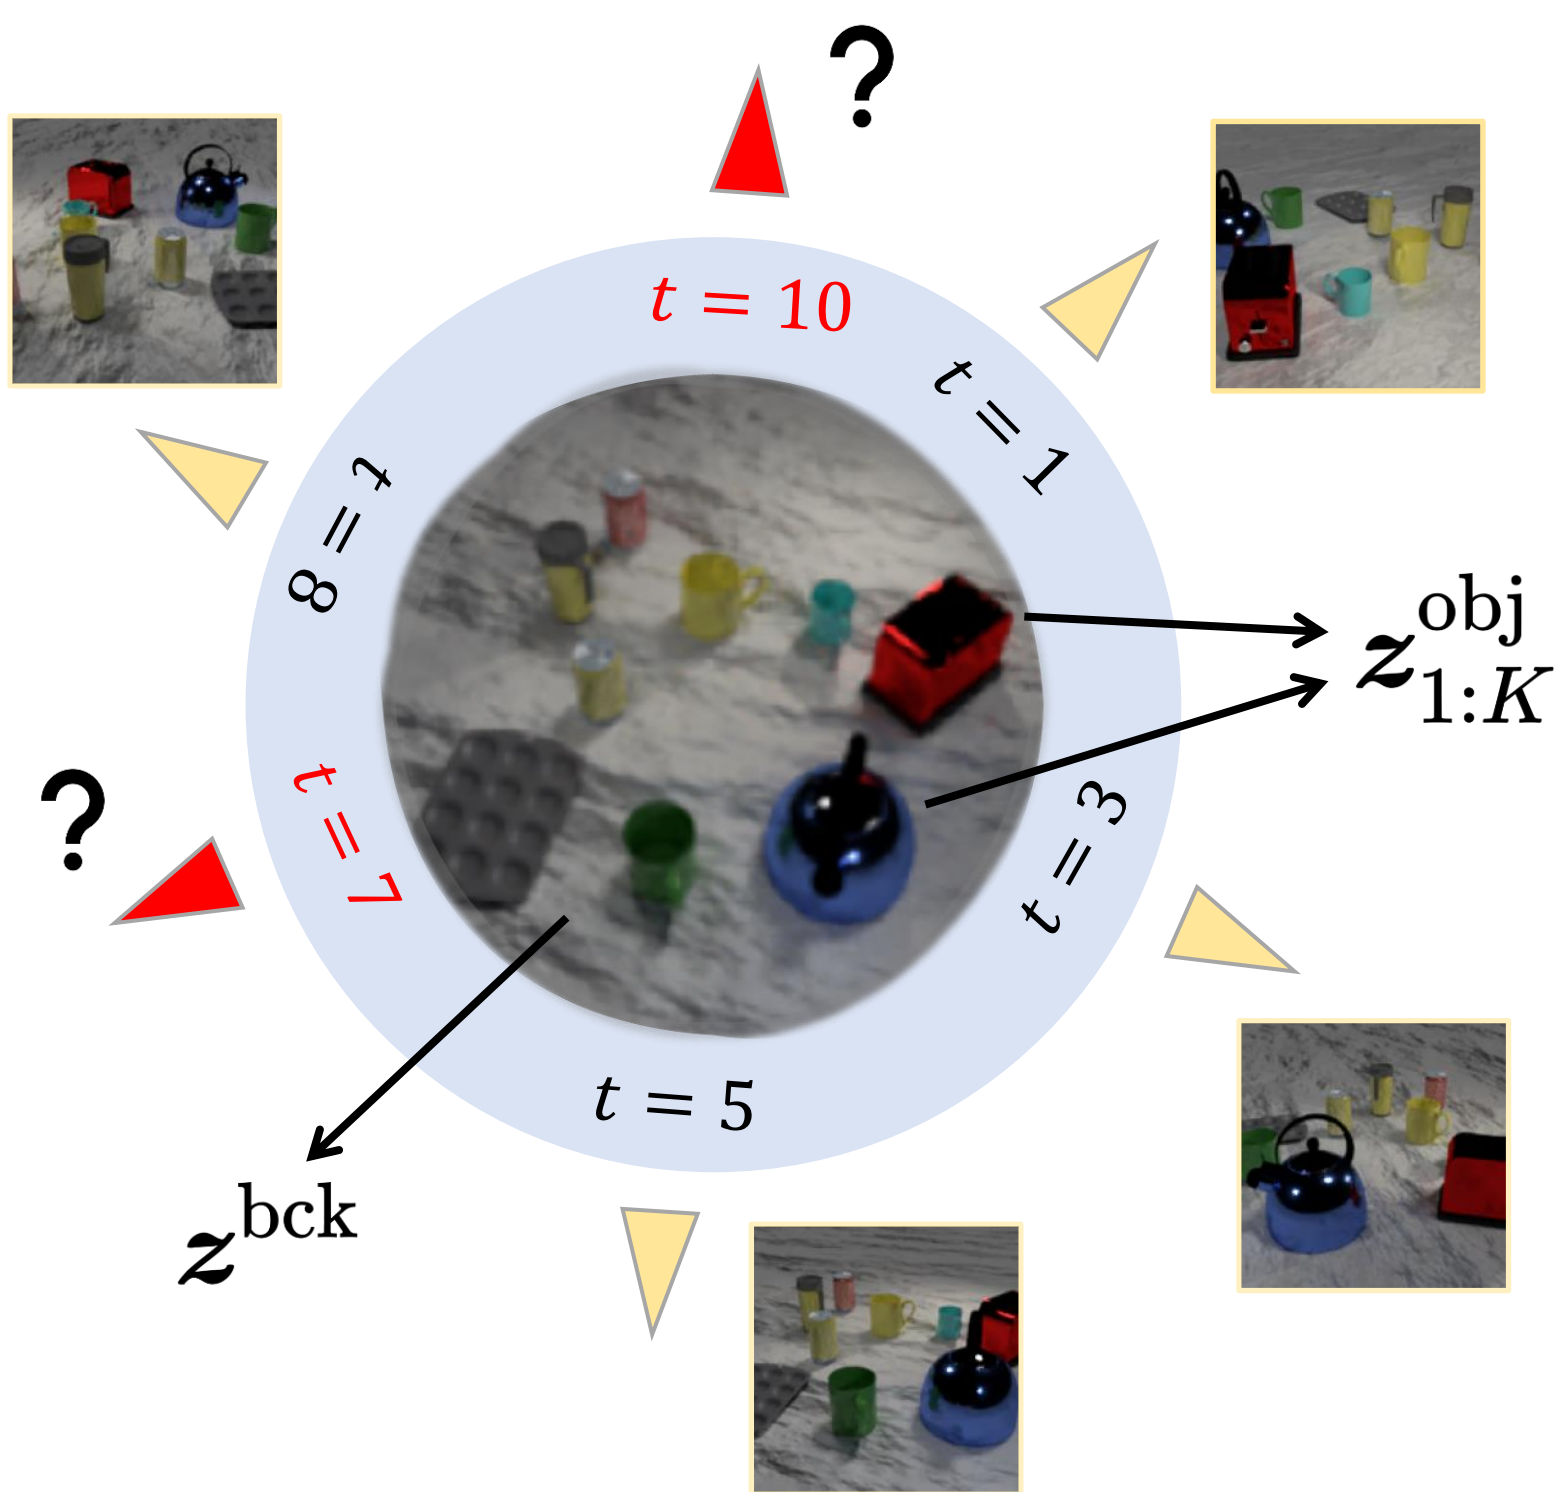

**Observations**

**Predictions**

$t = 1$      $t = 3$      $t = 5$      $t = 8$

$t = 7$      $t = 10$

(a)

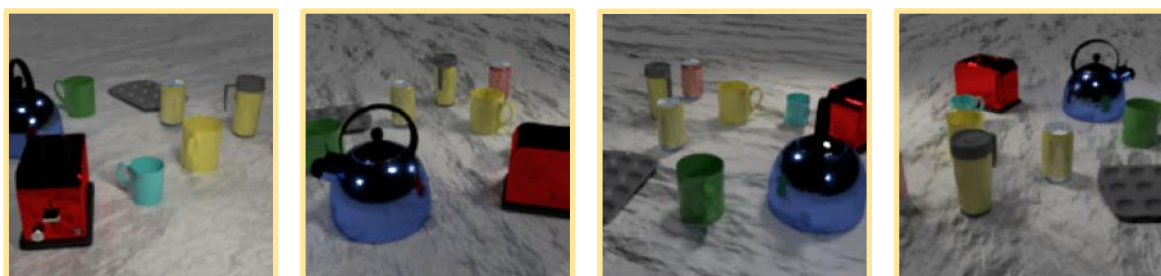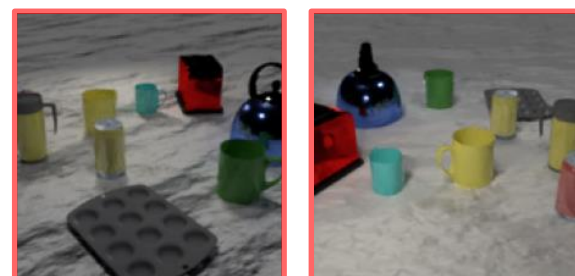

(b)

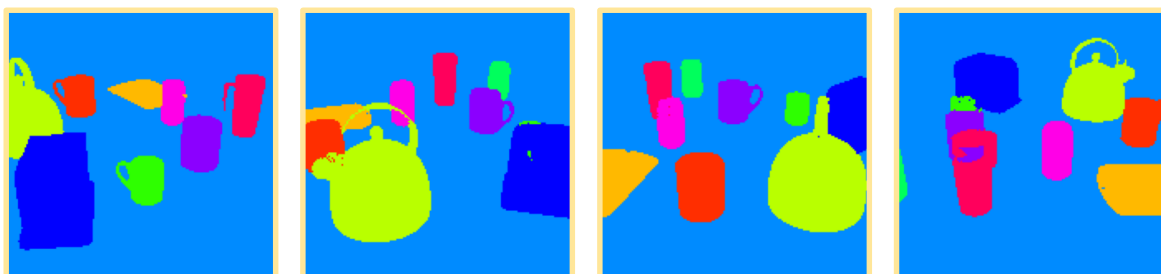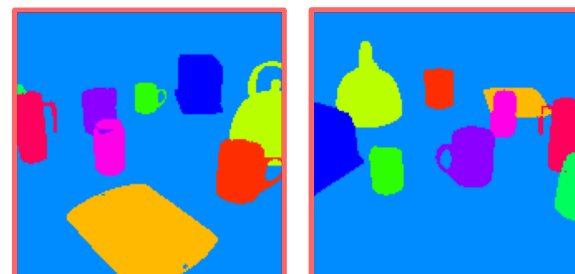

(c)

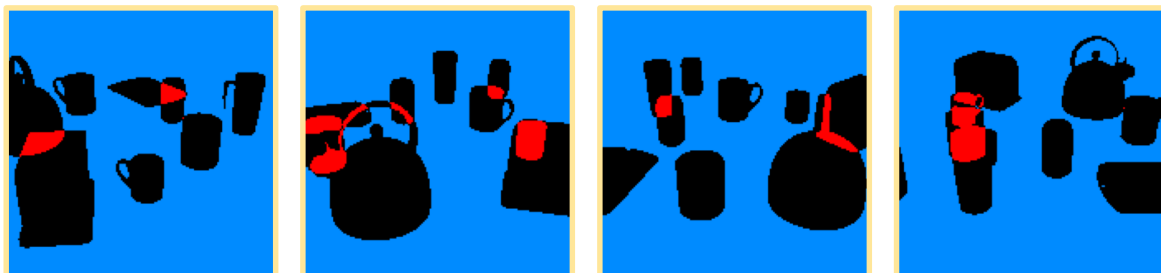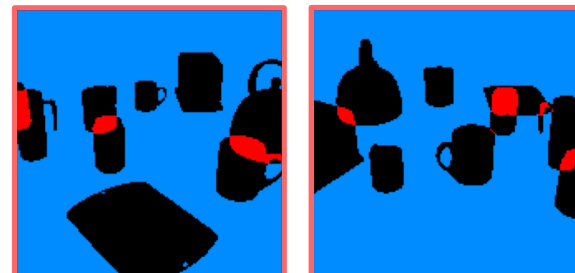

(d)

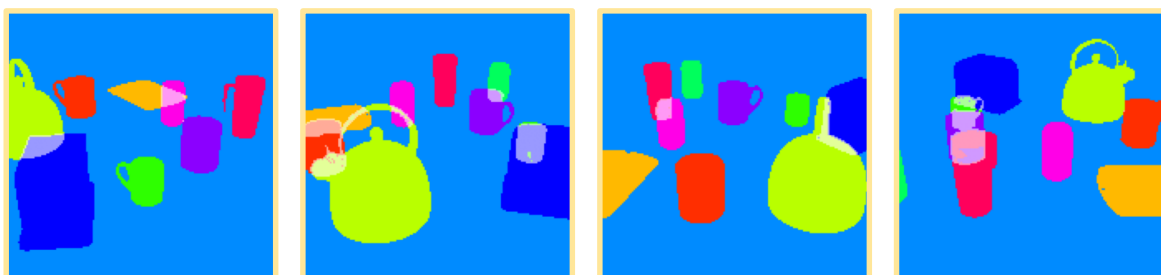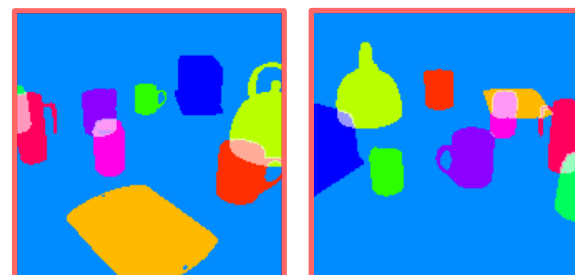

Supplement: supplementary_material [file attachment]

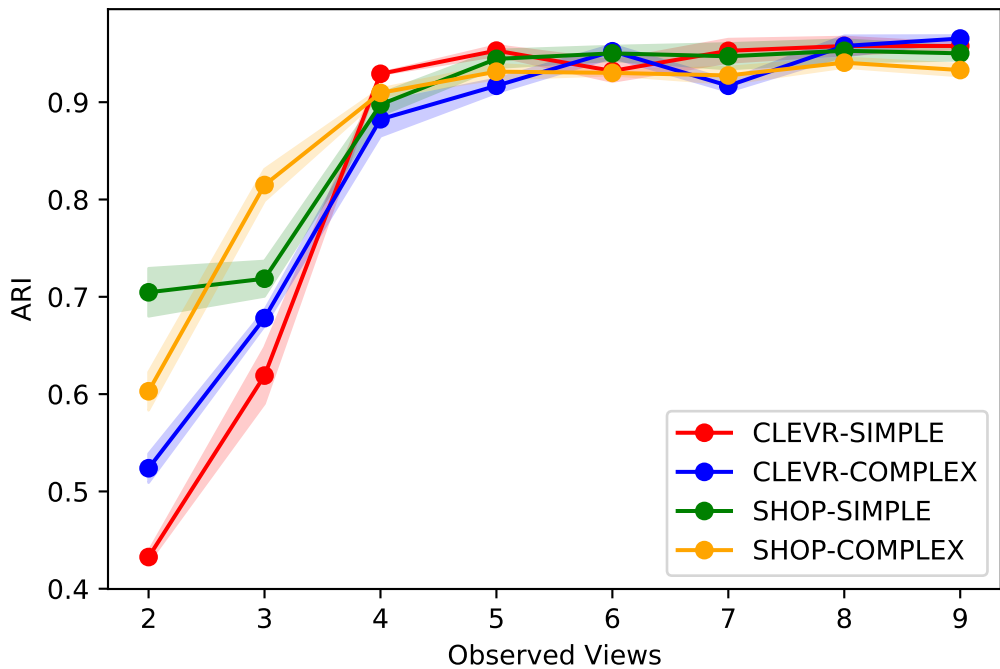

Supplement: supplementary_material [file attachment]

image

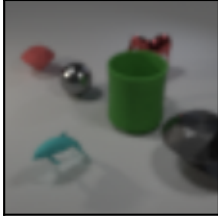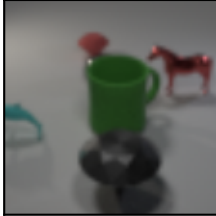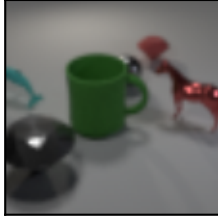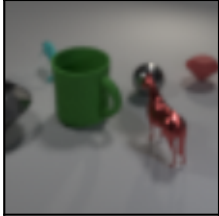

recon

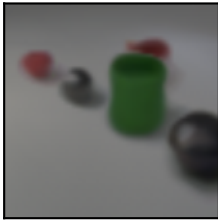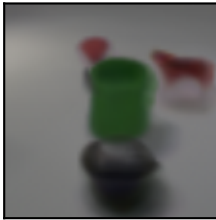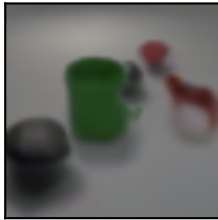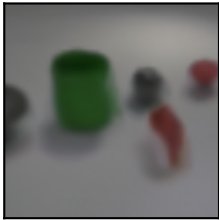

segment

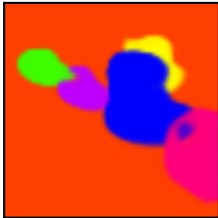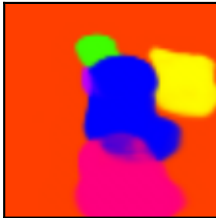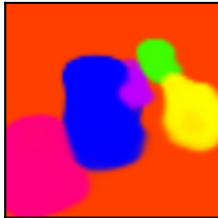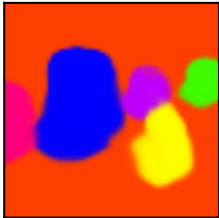

Supplement: supplementary_material [file attachment]

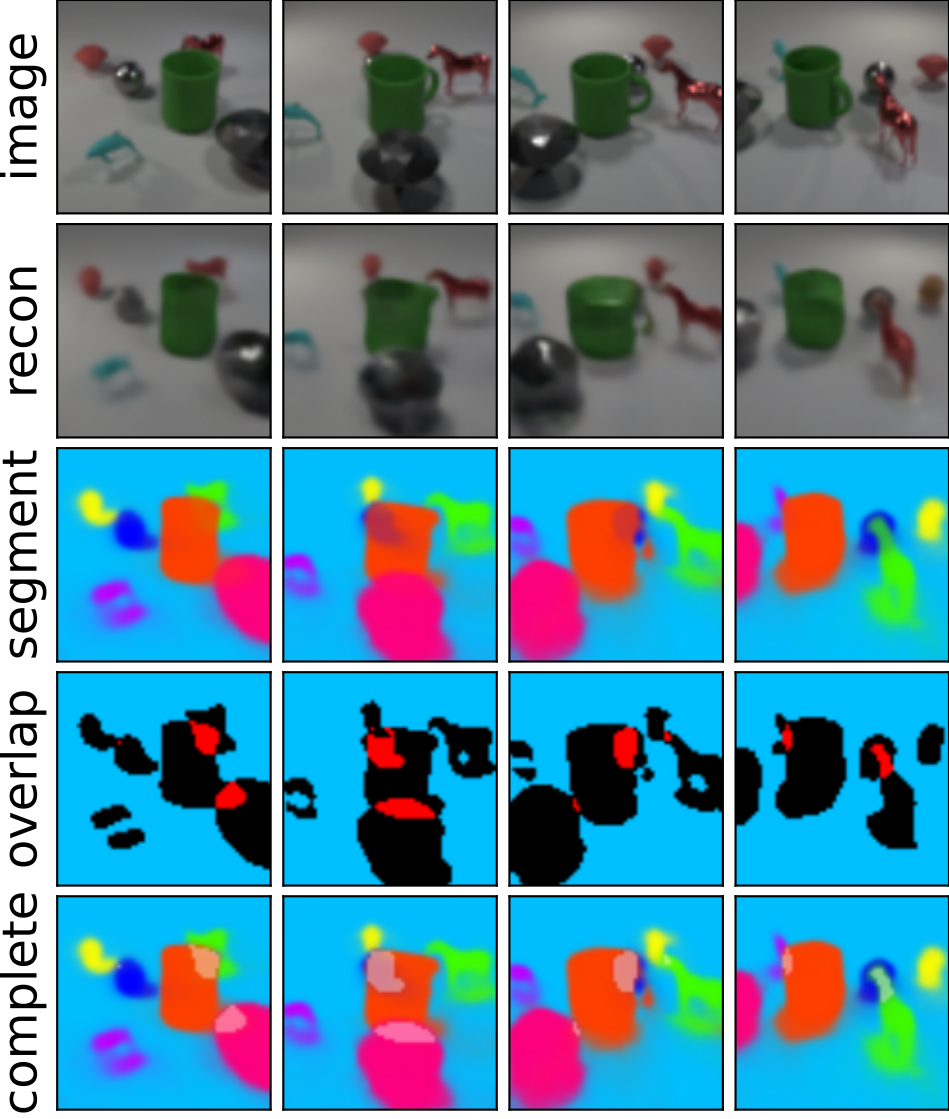

Supplement: supplementary_material [file attachment]

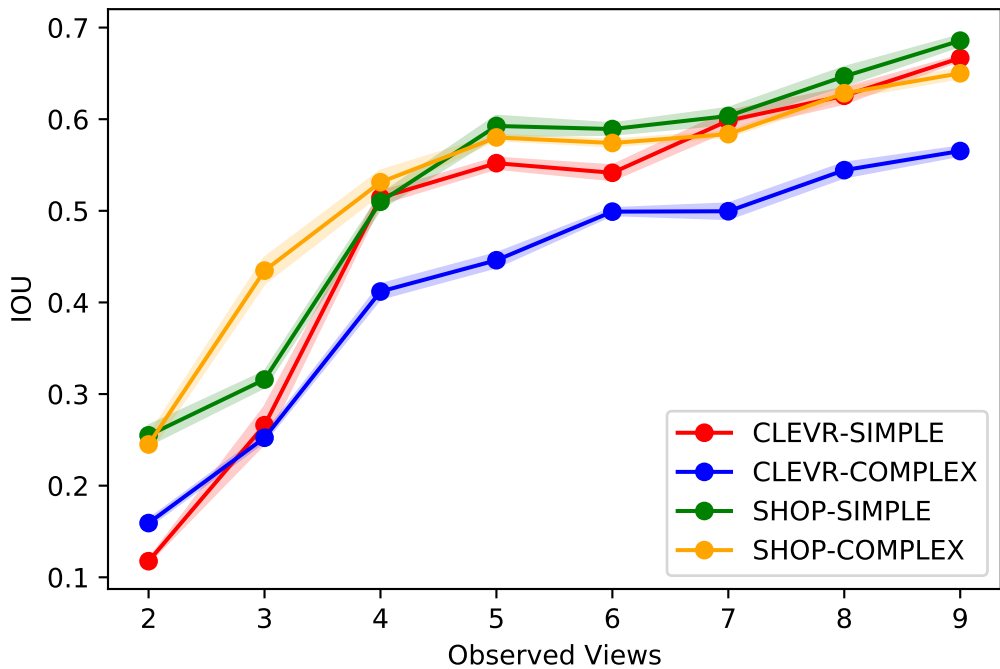

Supplement: supplementary_material [file attachment]

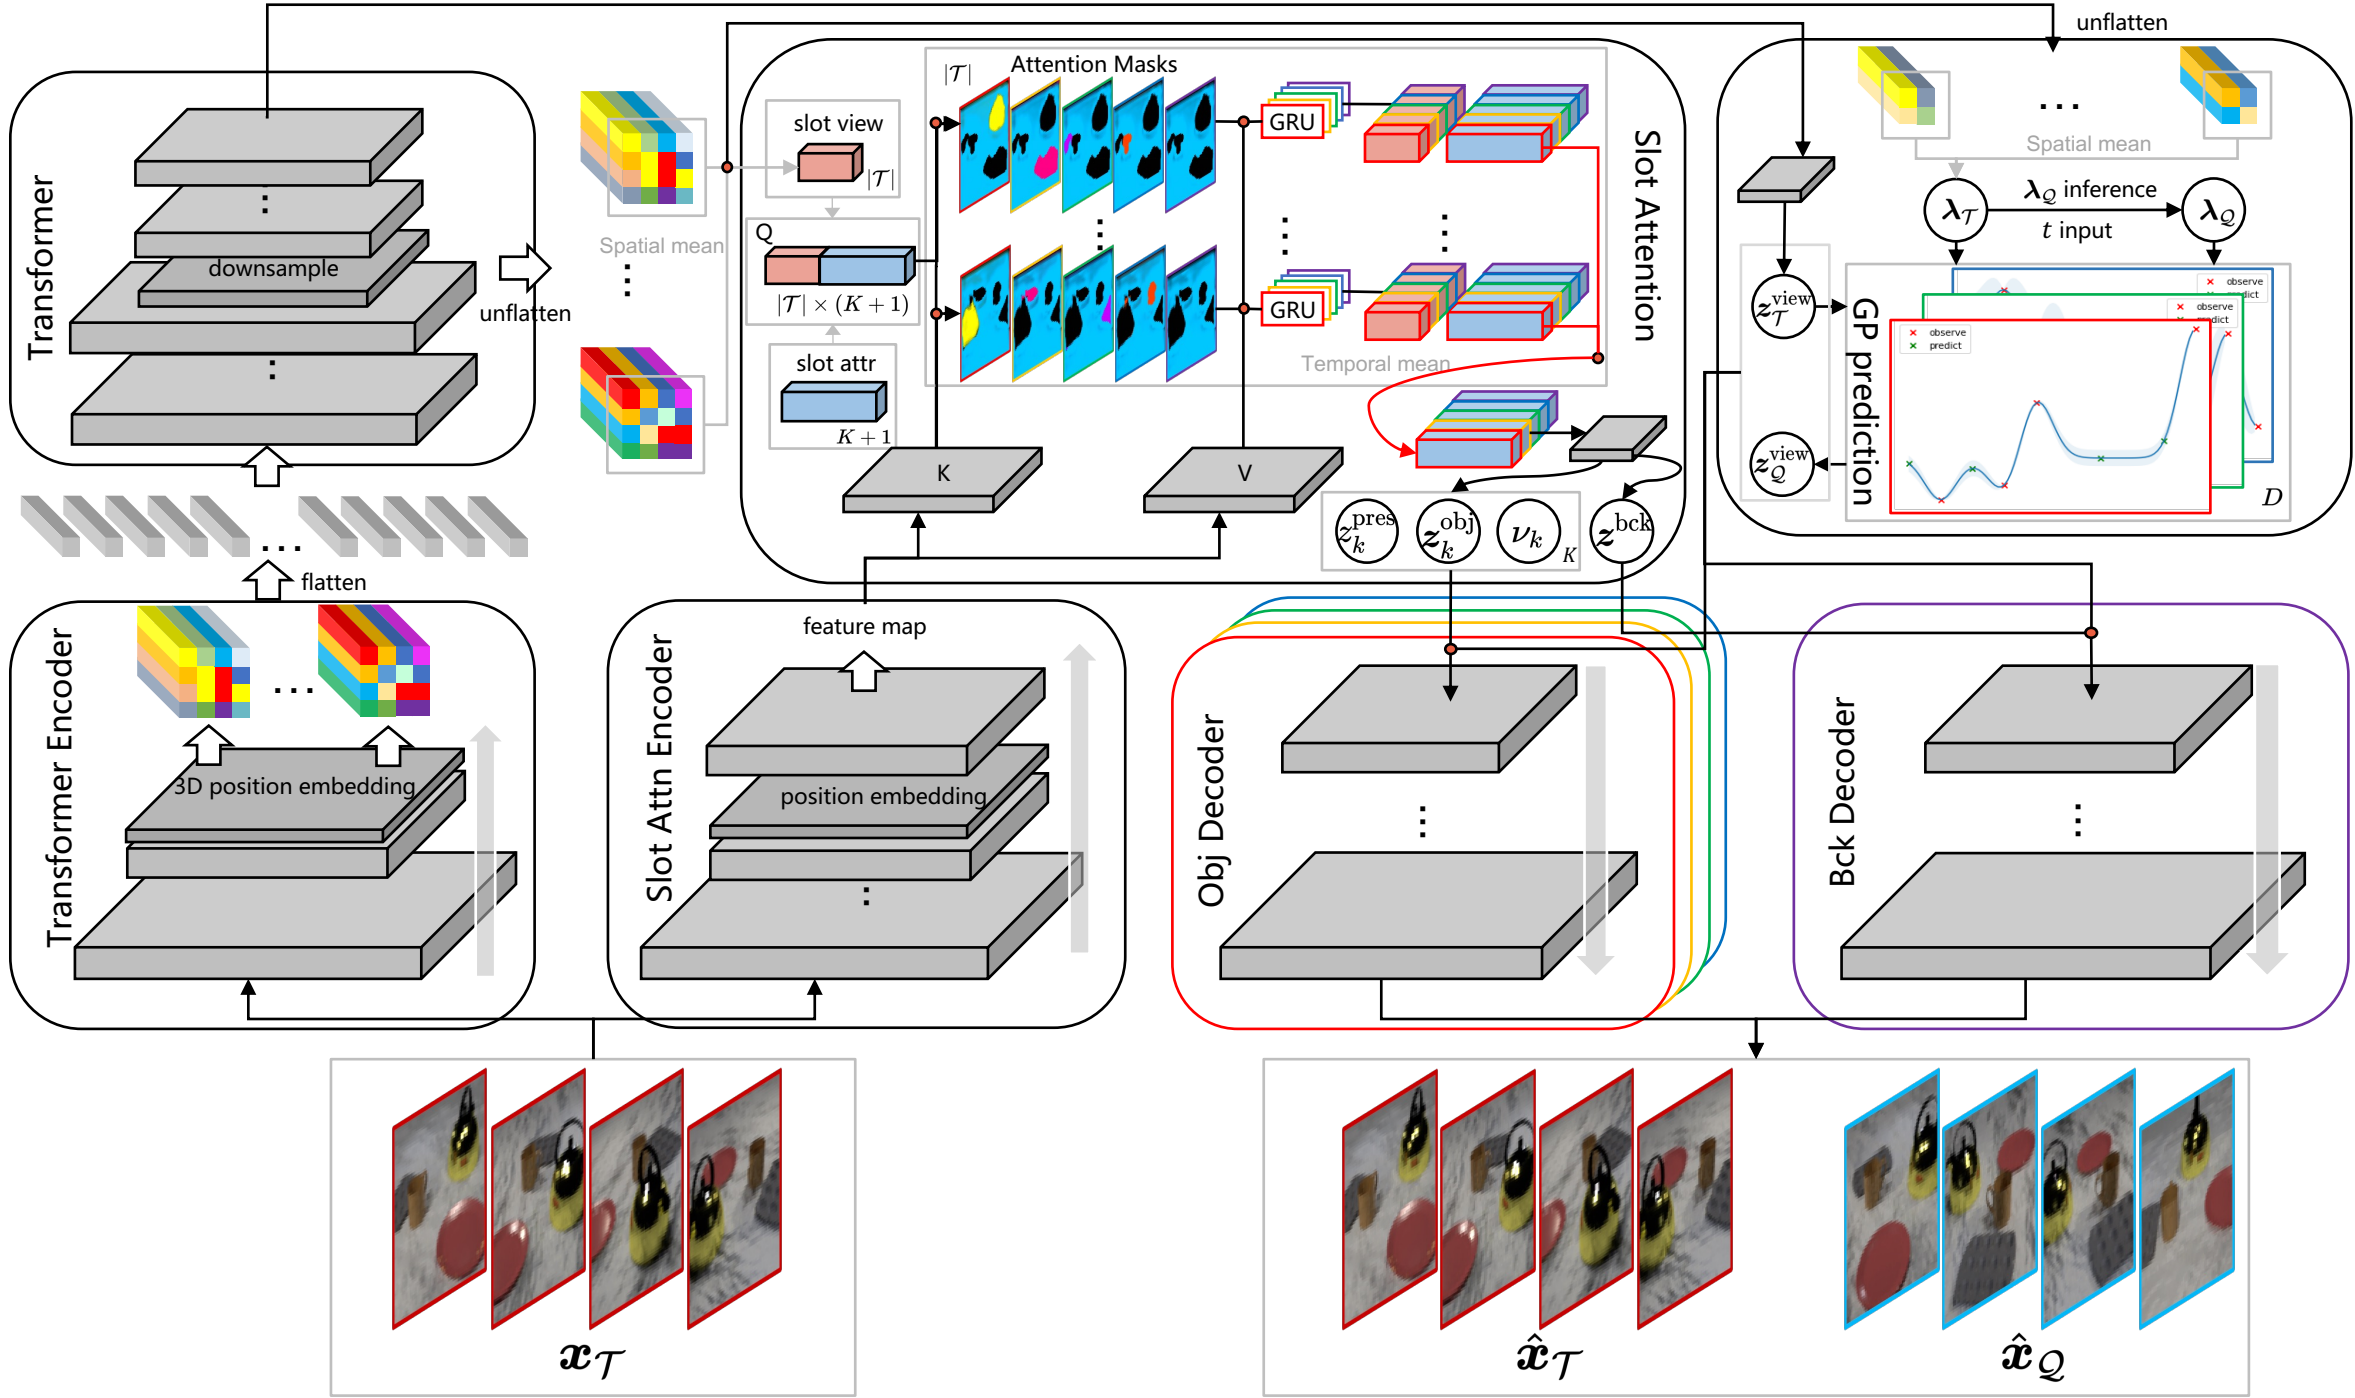

Supplement: supplementary_material [file attachment]

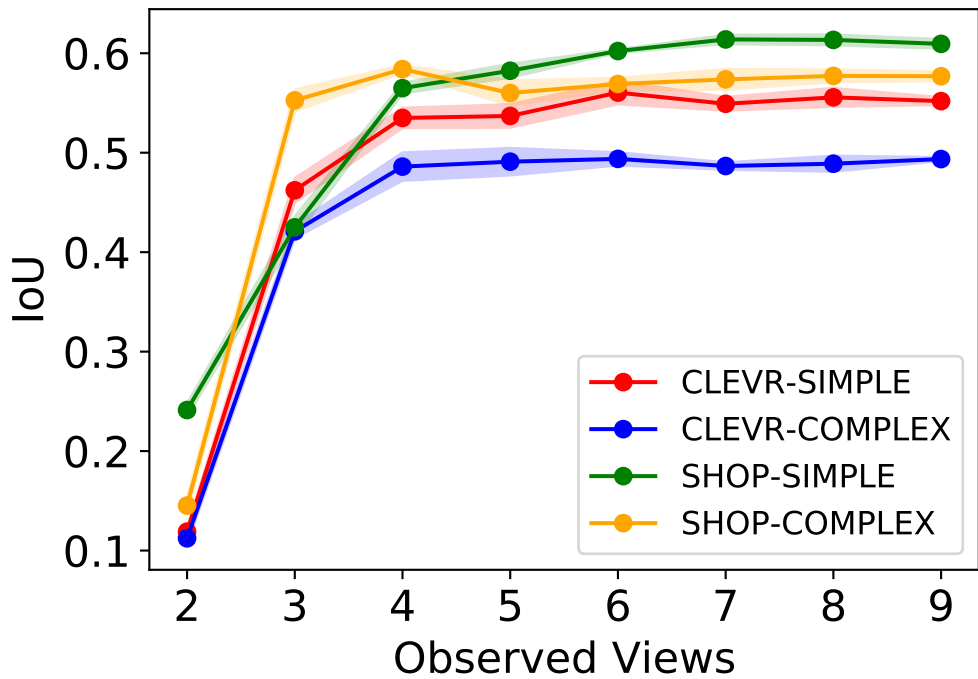

Supplement: supplementary_material [file attachment]

image

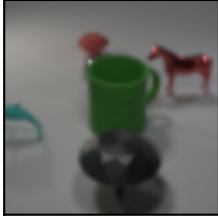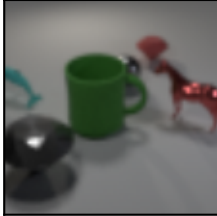

recon

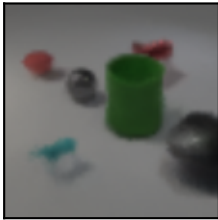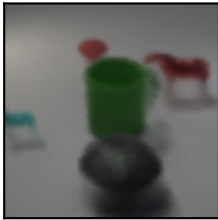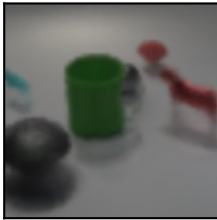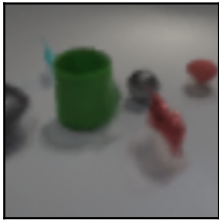

segment

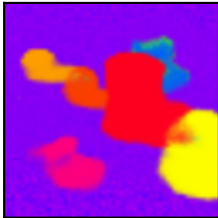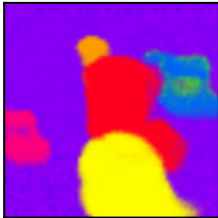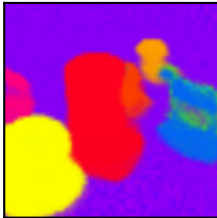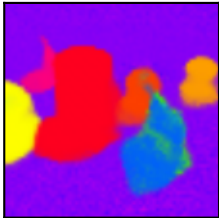

Supplement: supplementary_material [file attachment]

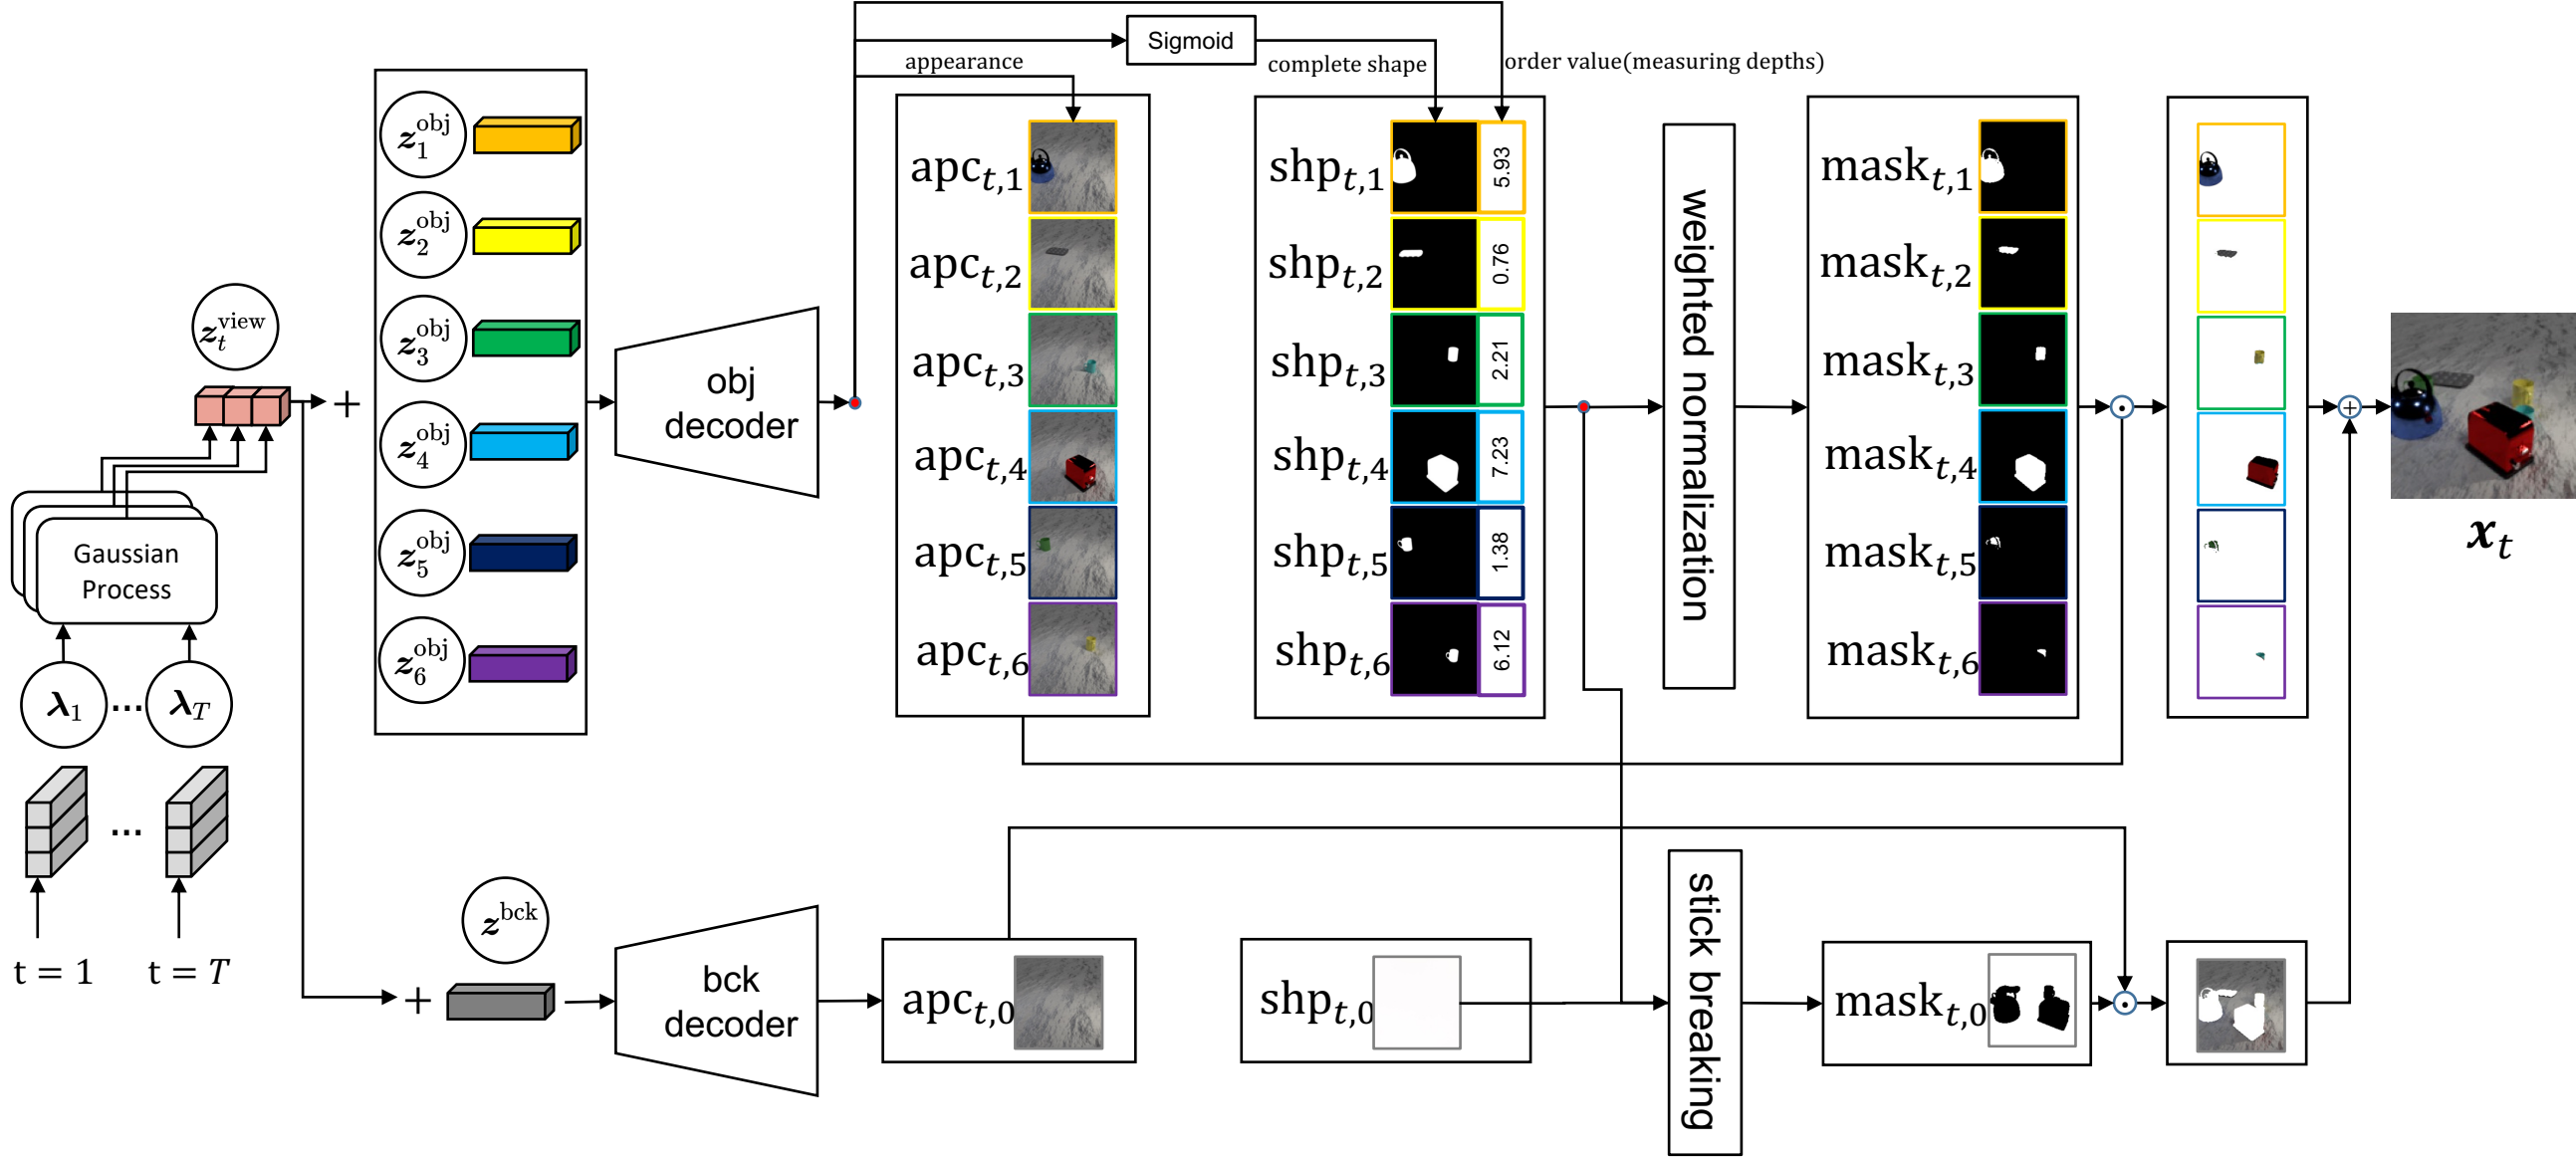

Supplement: supplementary_material [file attachment]

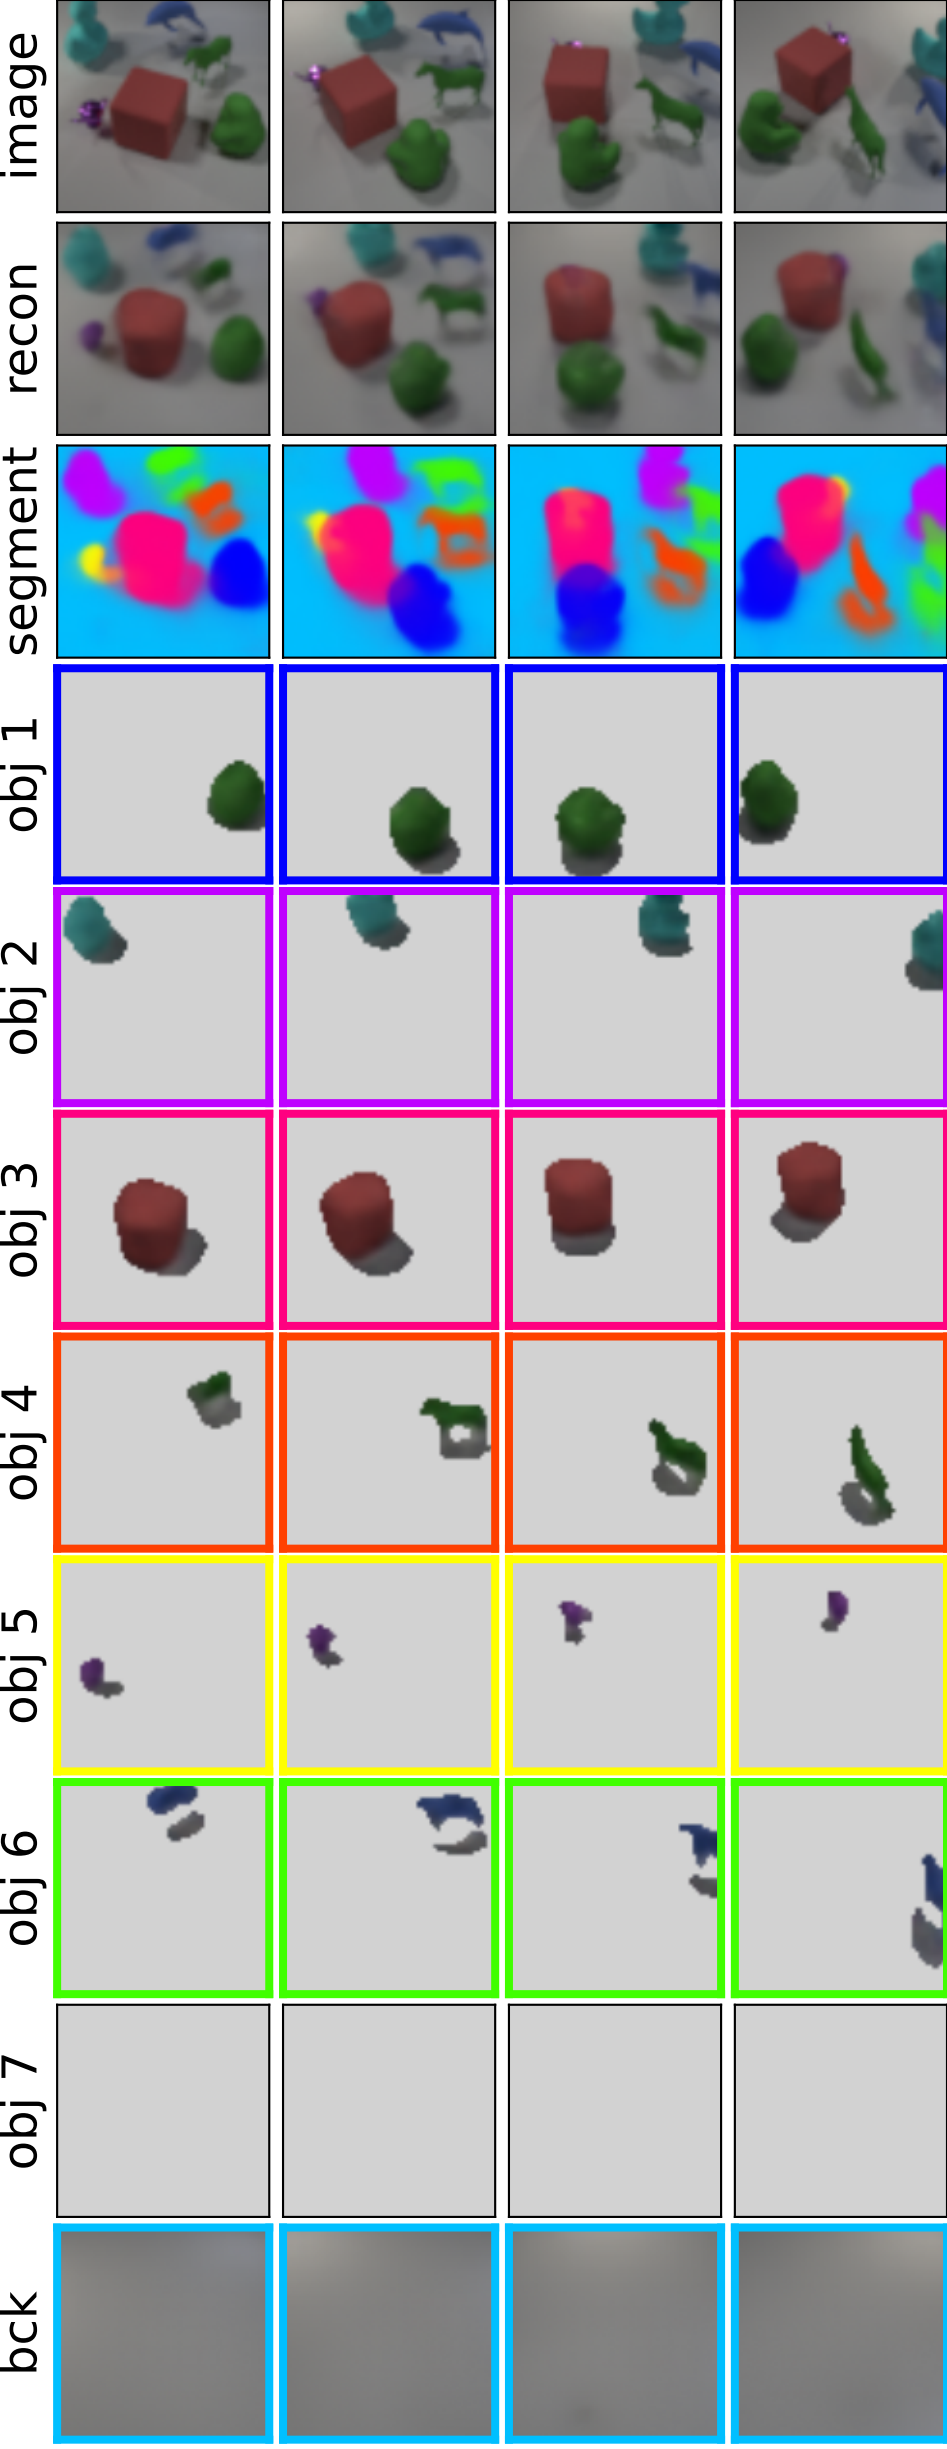

Supplement: supplementary_material [file attachment]

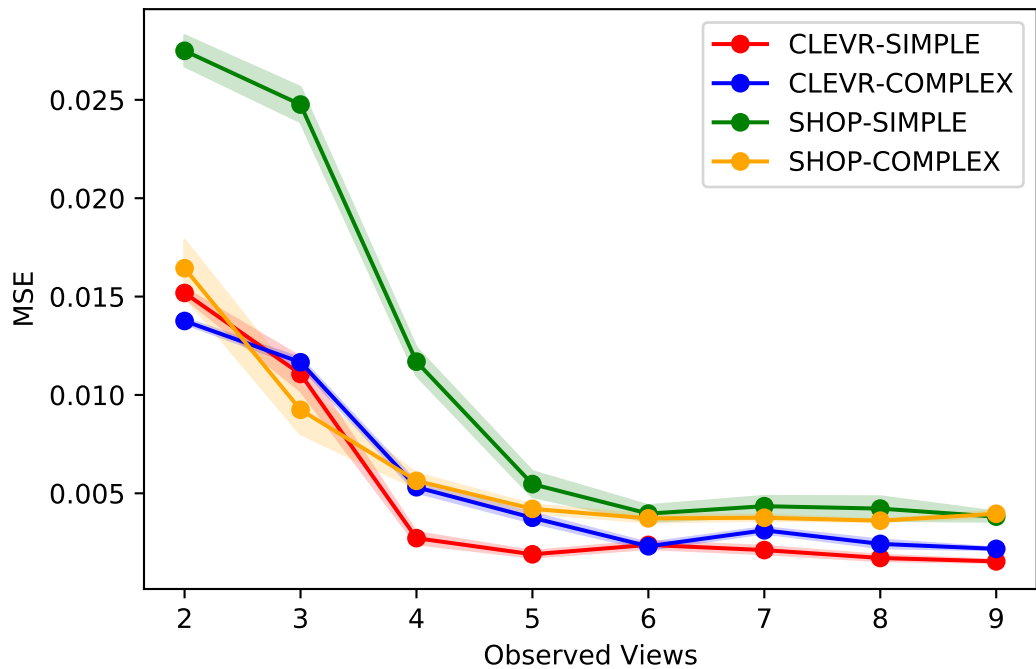

Supplement: supplementary_material [file attachment]

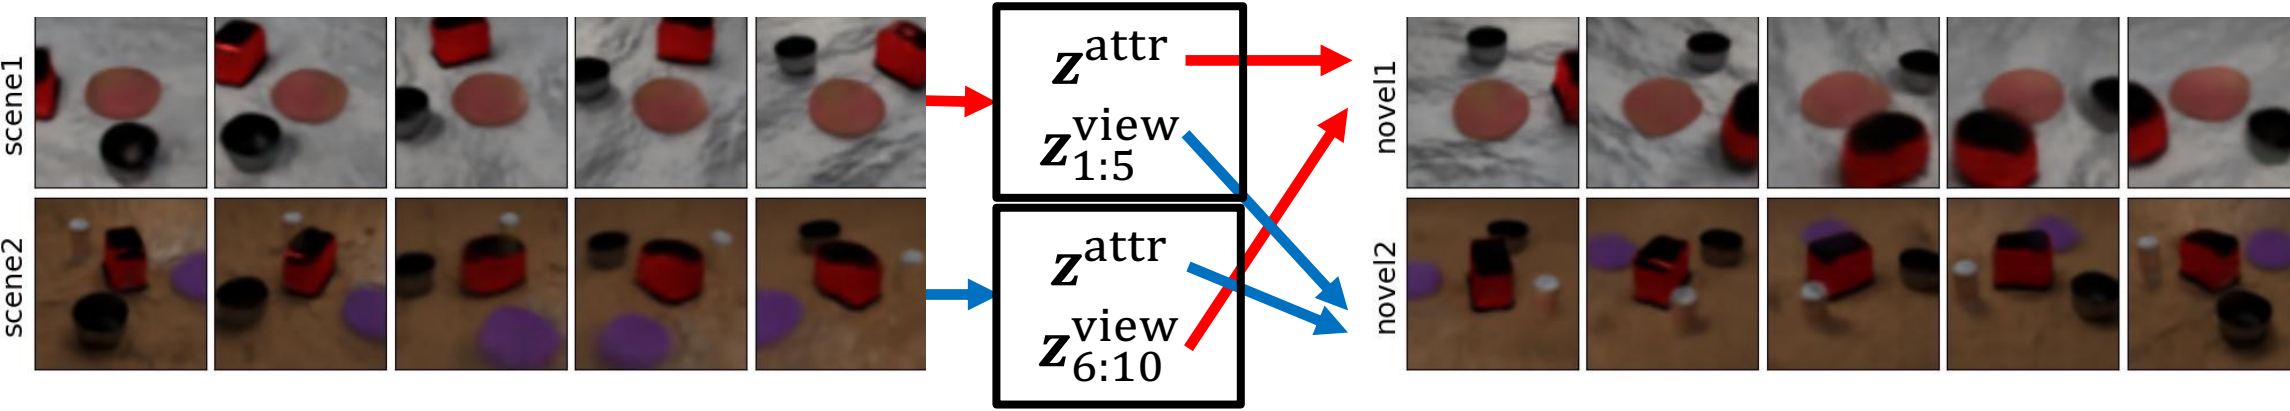

Supplement: supplementary_material [file attachment]

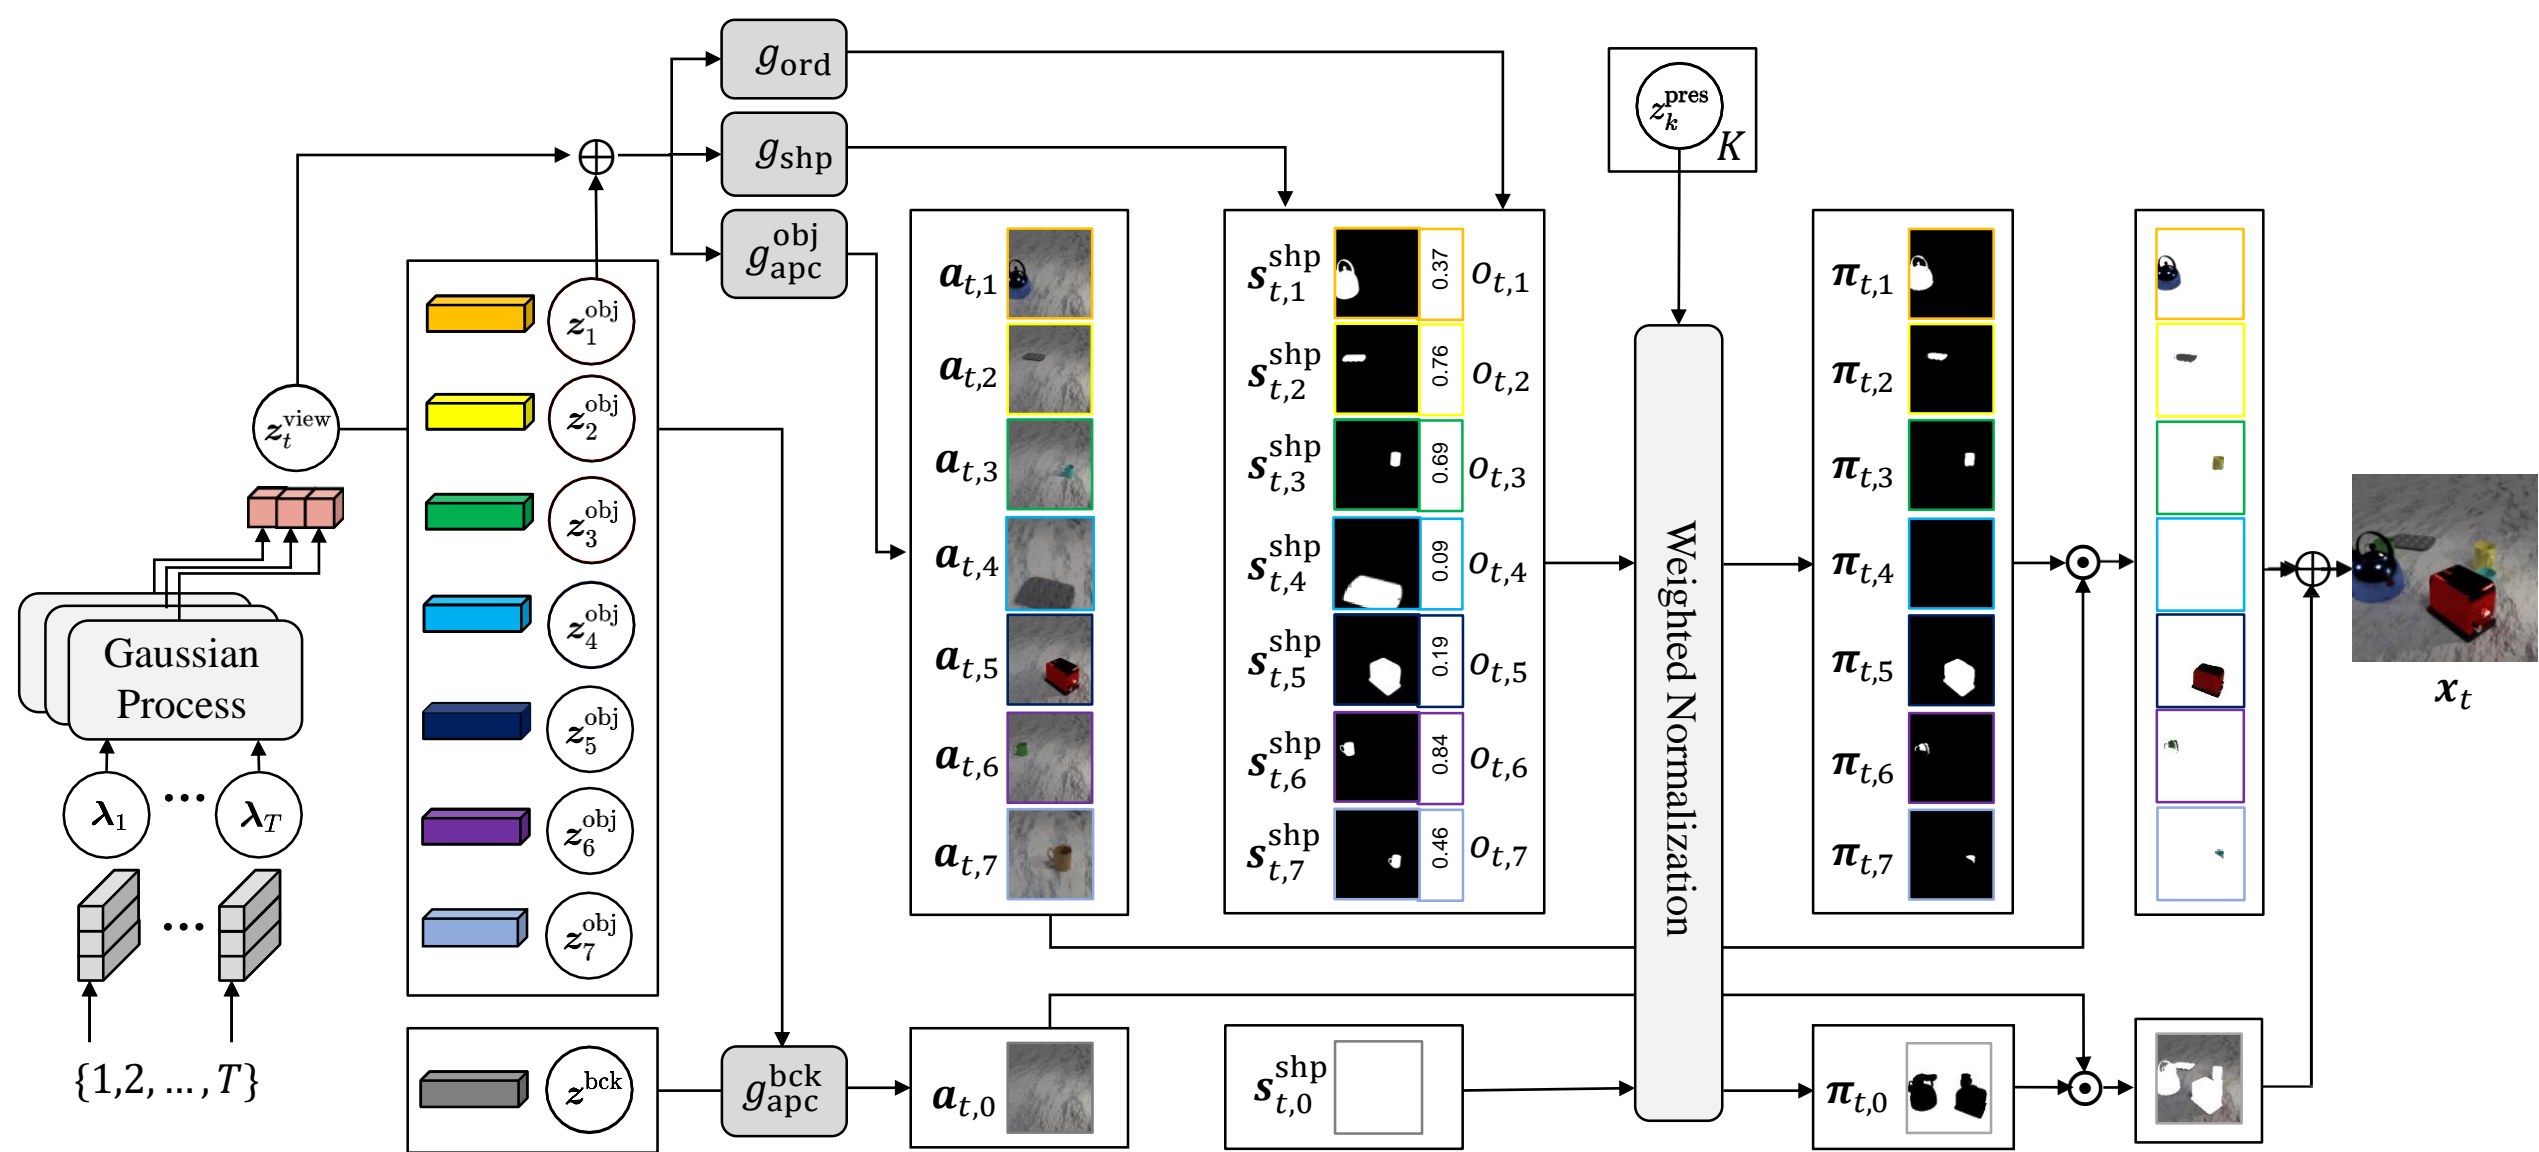

Supplement: supplementary_material [file attachment]
